## **Coevolution of the CDCA7-HELLS ICF-related nucleosome remodeling complex and DNA methyltransferases**

Hironori Funabiki<sup>1,3</sup>, Isabel E. Wassing<sup>1</sup>, Qingyuan Jia<sup>1</sup>, Ji-Dung Luo<sup>2</sup>, and Thomas Carroll<sup>2</sup>

<sup>1</sup>Laboratory of Chromosome and Cell Biology, The Rockefeller University, New York, NY 10065

<sup>2</sup>Bioinformatics Resource Center, The Rockefeller University, New York, NY 10065

<sup>3</sup> Correspondence: [funabih@rockefeller.edu](mailto:funabih@rockefeller.edu)

## Summary

5-Methylcytosine (5mC) and DNA methyltransferases (DNMTs) are broadly conserved in eukaryotes but are also frequently lost during evolution. The mammalian SNF2 family ATPase HELLS and its plant ortholog DDM1 are critical for maintaining 5mC. Mutations in HELLS, its activator CDCA7, and the *de novo* DNA methyltransferase DNMT3B, cause immunodeficiency-centromeric instability-facial anomalies (ICF) syndrome, a genetic disorder associated with the loss of DNA methylation. We here examine the coevolution of CDCA7, HELLS and DNMTs. While DNMT3, the maintenance DNA methyltransferase DNMT1, HELLS, and CDCA7 are all highly conserved in vertebrates and green plants, they are frequently co-lost in other evolutionary clades. The presence-absence patterns of these genes are not random; almost all CDCA7 harboring eukaryote species also have HELLS and DNMT1 (or another maintenance methyltransferase, DNMT5). Coevolution of presence-absence patterns (CoPAP) analysis in Ecdysozoa further indicates coevolutionary linkages among CDCA7, HELLS, DNMT1 and its activator UHRF1. We hypothesize that CDCA7 becomes dispensable in species that lost HELLS or DNA methylation, and/or the loss of CDCA7 triggers the replacement of DNA methylation by other chromatin regulation mechanisms. Our study suggests that a unique specialized role of CDCA7 in HELLS-dependent DNA methylation maintenance is broadly inherited from the last eukaryotic common ancestor.

## Keywords

DNA methylation, ICF syndrome, nucleosome remodeler, coevolution

# Introduction

DNA methylation, particularly 5-methylcytosine (5mC) at CpG sequences, is widely conserved in eukaryotes. Along with its role in silencing transposable elements and suppressing aberrant intragenic transcription (Choi et al., 2020; Deniz et al., 2019; Neri et al., 2017), DNA methylation plays critical roles in developmental control, genome stability and the development of diseases such as cancers and immunodeficiencies (Greenberg and Bourc'his, 2019; Lyko, 2018; Nishiyama and Nakanishi, 2021; Robertson, 2005). Despite its versatility as an epigenetic control mechanism, DNA methyltransferases (DNMTs) are lost in multiple evolutionary lineages (Bewick et al., 2017b; Huff and Zilberman, 2014; Kyger et al., 2021; Ponger and Li, 2005; Zemach et al., 2010). While the evolutionary preservation and loss of DNMTs and other proteins involved in 5mC metabolism has been studied (Bewick et al., 2017b; de Mendoza et al., 2018; Dumesic et al., 2020; Engelhardt et al., 2022; Huff and Zilberman, 2014; Iyer et al., 2011; Lewis et al., 2020; Mondo et al., 2017; Mulholland et al., 2020; Nai et al., 2020; Tirot et al., 2021; Zemach et al., 2010), it remains unclear if there is any common process or event that leads to the loss of DNA methylation systems in certain evolutionary lineages. Since eukaryotic genomes are compacted by nucleosomes, DNA methylation systems must deal with this structural impediment (Felle et al., 2011). Could the emergence or loss of a specific nucleosome regulator affect the evolution of DNA methylation as an epigenetic mechanism?

DNMTs are largely subdivided into maintenance DNMTs and *de novo* DNMTs (Lyko, 2018; Ponger and Li, 2005). Maintenance DNMTs (directly or indirectly) recognize hemimethylated CpGs and restore symmetric methylation at these sites to prevent the passive loss of 5mC upon DNA replication. Conversely, methylation by *de novo* DNMTs does not require methylated DNA templates. In animals, 5mC is maintained during DNA replication by DNMT1 together with UHRF1, which directly recognizes hemimethylated cytosine via the SRA domain and stimulates activity of DNMT1 in a manner dependent on its ubiquitin-ligase activity (Nishiyama and Nakanishi, 2021). *De novo* DNA methylation is primarily carried out by DNMT3 in animals, while plants encode the closely related *de novo* methyltransferase DRM (Cao et al., 2000). Some species, such as the fungus *Cryptococcus neoformans*, lack *de novo* DNA methylation activity (Catania et al., 2020; Dumesic et al., 2020; Huff and Zilberman, 2014). In *C. neoformans*, DNA methylation is maintained by DNMT5, which has a SNF2-family ATPase domain that is critical for its methyltransferase activity (Dumesic et al., 2020; Huff and Zilberman, 2014). Although DNMT5 orthologs cannot be found in land plants and animals, their broad existence in Stramenopiles, Chlorophyta and Fungi suggests that DNMT5, perhaps together with DNMT1, coexisted in the last eukaryotic common ancestor (LECA) (Huff and Zilberman, 2014).

DNA hypomethylation is a hallmark of immunodeficiency–centromeric instability–facial anomalies (ICF) syndrome, a rare genetic disorder which causes severe immune defects (Ehrlich, 2003; Ehrlich et al., 2006; Vukic and Daxinger, 2019). Activated lymphocytes of ICF patients display a characteristic cytogenetic abnormality at the juxtacentromeric heterochromatin of chromosome 1 and 16, where the satellite II repetitive element is highly enriched. In about 50 % of ICF patients, classified as ICF1, the disease is caused

by mutations in the *de novo* DNA methyltransferase DNMT3B (Hansen et al., 1999; Okano et al., 1999). The rarer genotypes known as ICF2, ICF3 and ICF4, are caused by mutations in ZBTB24, CDCA7, and HELLS (Helicase, Lymphoid Specific, also known as LSH, Lymphoid-Specific Helicase), respectively (de Greef et al., 2011; Thijssen et al., 2015; Unoki, 2021). While hypomethylation at satellite II repeats is common to all ICF genotypes, ICF2-4 patient-derived cells, but not ICF1 patient cells, additionally exhibit hypomethylation at centromeric alpha satellite repeats (Jiang et al., 2005; Thijssen et al., 2015; Velasco et al., 2018). Knock out of ICF genes in human HEK293 cells reproduces the DNA methylation profile observed in patient cells (Unoki et al., 2019). In mice, ZBTB24, HELLS and CDCA7, but not DNMT3B, are required for methylation at centromeric minor satellite repeats (Dennis et al., 2001; Hardikar et al., 2020; Ren et al., 2015; Thijssen et al., 2015). Therefore, although all ICF proteins promote DNA methylation, the ZBTB24-CDCA7-HELLS axis may target additional loci such as alpha satellites for DNA methylation in a DNMT3-independent manner. Indeed, the importance of HELLS in DNA methylation maintenance by DNMT1 has been reported (Han et al., 2020; Ming et al., 2020; Unoki, 2021; Unoki et al., 2020).

HELLS belongs to one of ~25 subclasses of the SNF2-like ATPase family (Flaus et al., 2006). Among these diverse SNF2 family proteins, HELLS appears to have a specialized role in DNA methylation. Reduced genomic DNA methylation was observed in HELLS (LSH) knockout mice (Dennis et al., 2001), transformed mouse fibroblasts (Dunican et al., 2013), mouse embryonic fibroblasts (Myant et al., 2011; Yu et al., 2014), and zebrafish and *Xenopus* embryos (Dunican et al., 2015). In fact, this function of HELLS in DNA methylation was originally inferred from studies in *Arabidopsis*, where mutations in the HELLS ortholog DDM1 (Decrease in DNA Methylation) cause drastic reduction of 5mC in transposable and repetitive elements (Miura et al., 2001; Vongs et al., 1993). Like HELLS, DDM1 is a SNF2 ATPase with demonstrable *in vitro* nucleosome remodeling activity (Brzeski et al., 2003; Jenness et al., 2018). Since DNA methylation defects in *ddm1* mutants can be rescued by the loss of histone H1, it has been proposed that DDM1-mediated remodeling of H1-bound nucleosomes is important for DNA methylation (Zemach et al., 2013).

CDCA7 (also known as JPO1) was originally identified as one of eight CDCA genes that exhibited cell division cycle-associated gene expression profiles (Walker, 2001). A putative 4CXXC zinc finger binding domain (zf-4CXXC\_R1) is conserved among CDCA7 homologs, including its paralog CDCA7L (also known as JPO2 and R1) (Chen et al., 2005; Ou et al., 2006). Multiple lines of evidence support the idea that CDCA7 functions as a direct activator of the nucleosome remodeling enzyme HELLS. First, in *Xenopus* egg extracts, HELLS and CDCA7e (the sole CDCA7 paralog present in *Xenopus* eggs) both preferentially interact with nucleosomes rather than nucleosome-free DNA, and binding of HELLS to chromatin depends on CDCA7e (Jenness et al., 2018). Second, HELLS alone exhibits little nucleosome sliding activity, but CDCA7e greatly stimulates it (Jenness et al., 2018). Third, HELLS directly binds to CDCA7e (as well as CDCA7 and CDCA7L), even in the absence of DNA (Jenness et al., 2018). Fourth, HELLS and CDCA7 interact in human cells (Unoki et al., 2019), where chromatin binding of HELLS also depends on CDCA7 (Jenness et al., 2018). ICF disease mutations

located in the conserved zf-4CXXC\_R1 domain (R274C, R274H and R304H in human CDCA7) inhibited chromatin binding of CDCA7 and HELLS without interfering with CDCA7-HELLS interaction (Jenness et al., 2018), such that the zf-4CXXC\_R1 domain likely serves as a chromatin binding module. Therefore, we proposed that CDCA7 and HELLS form a bipartite nucleosome remodeling complex, termed CHIRRC (CDCA7-HELLS ICF-related nucleosome remodeling complex) (Jenness et al., 2018).

We previously suggested that ZBTB24, CDCA7, and HELLS form a linear pathway to support DNA methylation (Jenness et al., 2018). ZBTB24 is a transcription factor which binds the promoter region of CDCA7 and is required for its expression (Wu et al., 2016). As CDCA7 binds HELLS to form the CHIRRC, we proposed that its ATP-dependent nucleosome sliding activity exposes DNA that was previously wrapped around the histone octamer and makes it accessible for DNA methylation (Jenness et al., 2018). Indeed, DNMT3A and DNMT3B cannot methylate DNA within a nucleosome (Felle et al., 2011), and the importance of HELLS and DDM1 for DNA methylation at nucleosomal DNA has been reported in mouse embryonic fibroblasts and *Arabidopsis*, respectively (Lyons and Zilberman, 2017). Given the frequent loss of 5mC as an epigenetic mark in multiple evolutionary lineages, it is striking that the role for HELLS/DDM1 in DNA methylation appears to be conserved in evolutionarily distant mammals and plants. Importantly, this would suggest that the promotion of DNA methylation through nucleosome sliding is specific to HELLS and cannot be substituted by other SNF2 family nucleosome remodelers, such as SNF2 (SMARCA2/4), INO80, and ISWI (SMARCA1/5). If the specific function of HELLS and CDCA7 in DNA methylation is indeed derived from the last eukaryotic common ancestor (LECA), we hypothesize that HELLS and CDCA7 coevolved with other DNA methylation machineries. We here test this hypothesis and discuss the potential sequence of events that led to the loss of DNA methylation in some species.

## Results

### CDCA7 is absent from the classic model organisms that lack genomic 5mC

CDCA7 is characterized by the unique zf-4CXXC\_R1 domain (Pfam PF10497 or Conserved Domain Database [CDD] cl20401) (Lu et al., 2020; Mistry et al., 2021). Conducting a BLAST search using human CDCA7 as a query sequence against the Genbank protein database, we realized that no zf-4CXXC\_R1-containing proteins are identified in the classic model organisms *Drosophila melanogaster*, *Caenorhabditis elegans*, *Schizosaccharomyces pombe* and *Saccharomyces cerevisiae*, which are all also known to lack any DNMTs and genomic 5mC (Zemach et al., 2010). However, we identified a protein with a zf-4CXXC\_R1 motif in the bumblebee *Bombus terrestris* and the thale cress *A. thaliana*, which have both maintenance and *de novo* DNMTs (Bewick et al., 2017b; Chan et al., 2005; Li et al., 2018; Zemach et al., 2010) (Figure 1 and Figure 1—source data 1). Based on the reciprocal best hits (RBH) criterion using human HELLS as a query sequence (see Methods) (Ward and Moreno-Hagelsieb, 2014), HELLS-like proteins were identified in *A. thaliana* (DDM1) and *S. cerevisiae* (Irc5) in line with previous reports (Litwin et al., 2017), as well as in *B. terrestris*. No clear HELLS-like proteins were identified in *D. melanogaster*, *C. elegans*, or *S. pombe*. This pilot-scale

analysis based on the RBH criterion led us to hypothesize that the evolutionary maintenance of CDCA7 is linked to that of HELLS and DNMTs. In order to statistically validate this hypothesis, we set out to systematically identify and classify homologs of CDCA7, HELLS and DNMTs in a broad range of evolutionary lineages.

### CDCA7 family proteins in vertebrates

We first characterized evolutionary conservation of CDCA7 family proteins in vertebrates, where 5mC, DNMT1 and DNMT3 are highly conserved. A BLAST search against the Genbank protein database identified two zf-4CXXC\_R1 domain-containing proteins, CDCA7/JPO1 and CDCA7L/R1/JPO2, throughout Gnathostomata (jawed vertebrates) (Figure 2A, Figure 2B, Figure 2–figure supplement 1, and Figure 1–source data 1). In frogs (such as *Xenopus*, but not all amphibians), and some fishes (such as *Astyanax mexicanus* and *Takifugu rubripes*), a third paralog CDCA7e exists. CDCA7e is the only CDCA7-like protein that can be detected in *Xenopus* eggs (Jenness et al., 2018), and thus likely represents a form specific to oocytes and early embryos in these species. Among twelve conserved cysteine residues originally reported in the zf-4CXXC\_R1 domain (Ou et al., 2006), the 12<sup>th</sup> cysteine residue is not conserved in *Rhincodon typus* (whale shark) CDCA7 and in *Xenopus laevis* CDCA7e. In general, the 12<sup>th</sup> cysteine residue of the zf-4CXXC\_R1 domain is least conserved among CDCA7 homologs within and outside of vertebrates, such that we do not consider it a key component of the zf-4CXXC\_R1 domain (see below). Considering that the jawless fish *Petromyzon marinus* (sea lamprey) and other invertebrates commonly possess only one CDCA7 family gene (Figure 2, see Figure 6 and Figure 1–source data 1), the CDCA7 paralogs may have emerged in jawed vertebrates. Overall, the zf-4CXXC\_R1 sequence is highly conserved among vertebrate CDCA7 homologs, including three residues that are mutated in ICF3 patients (R274, G294 and R304 in human CDCA7) (Figure 2B) (Thijssen et al., 2015). Note that these amino acid positions of the ICF3 mutations in human CDCA7 are based on the previously reported sequence of an NP\_665809 (Thijssen et al., 2015), which is annotated as isoform 2 (371 amino acids), whereas we list the isoform 1 (NP\_114148) with 450 amino acids in this study (Figure 2A).

While the presence of four CXXC motifs in the zf-4CXXC\_R1 domain is reminiscent of a classic zinc finger-CXXC domain (zf-CXXC, Pfam PF02008), which binds to nonmethylated CpG (Long et al., 2013), their cysteine arrangement is distinctly different, perhaps reflecting the capacity of zf-4CXXC\_R1 domain to recognize nucleosomes (Jenness et al., 2018) and potentially specific epigenetic marks or DNA sequences. In vertebrate CDCA7 paralogs, eleven conserved cysteines are arranged as CXXCX<sub>10</sub>CX<sub>4</sub>CX<sub>7</sub>CXXCX<sub>19</sub>CXXCX<sub>3</sub>CXCXXC. In contrast, in the classic zf-CXXC domain eight cysteines are arranged as CXXCXXCX<sub>4-5</sub>CXXCXXCX<sub>8-14</sub>CX<sub>4</sub>C (Long et al., 2013). Apart from the zf-4CXXC\_R1 domain, vertebrate CDCA7 family proteins often, but not always, contain one or two Lens epithelium-derived growth factor (LEDGF)-binding motif(s) (Figure 2A and Figure 2C), defined as ([E/D]XEXFXGF) (Tesina et al., 2015). It has been reported that human CDCA7L and CDCA7 both interact with c-Myc but apparently via different regions, a leucine zipper and a less-defined adjacent segment that overlaps with a bipartite nuclear localization signal, respectively (Gill et al., 2013; Huang et al., 2005). This leucine zipper sequence is highly conserved

among vertebrate CDCA7 family proteins (Figure 2A and Figure 2D). In contrast to zf-CXXC domain-containing proteins such as KDM2A/B, DNMT1, MLL1/2, and TET1/3, the vertebrate CDCA7 family proteins do not contain any predicted enzymatic domains (Huang et al., 2005; Maertens et al., 2006; Tesina et al., 2015).

### Plant homologs of CDCA7

A BLAST sequence homology search identified three classes of zf-4CXXC\_R1 domain-containing proteins in *Arabidopsis thaliana* (Figure 3). Class I proteins have one zf-4CXXC\_R1 domain with no other detectable domains listed in CDD or Pfam/InterPro (Paysan-Lafosse et al., 2023). Strikingly, all three ICF-associated residues (R274, G294 and R304 in human CDCA7) as well as all eleven characteristic cysteines of the zf-4CXXC\_R1 domain are conserved, with the exception that the position of the fourth cysteine is shifted two residues toward the N terminus. We define the domain with the conservation of the signature cysteine residues and three ICF-associated residues as “class I zf-4CXXC\_R1” and hypothesize that proteins with class I zf-4CXXC\_R1 are CDCA7 orthologs (including their highly homologous paralogs in this report).

Class II proteins contain a zf-4CXXC\_R1 domain, a DDT domain and a WHIM1 domain. These proteins were previously identified as DDR1-3 (Dong et al., 2013). DDT and WHIM1 domains are commonly found in proteins that interact with SNF2h/ISWI (Aravind and Iyer, 2012; Li et al., 2017; Yamada et al., 2011). Indeed, it was reported that *Arabidopsis* DDR1 and DDR3 interact with the ISWI orthologs CHR11 and CHR17 (Tan et al., 2020). Among the eleven cysteine residues in the zf-4CXXC\_R1 domain of these proteins, the position of the fourth residue is shifted towards the C-terminus. The ICF-associated glycine residue (G294 in human CDCA7, mutated to valine in ICF3 patients) is replaced by isoleucine. We define the zf-4CXXC\_R1 containing a substitution at this glycine residue as class II zf-4CXXC\_R1.

Class III proteins are longer (~1000 amino acid) and contain an N-terminal zf-4CXXC\_R1 domain and a C-terminal JmjC domain (Pfam, PF02373), which is predicted to possess demethylase activity against histone H3K9me2/3 (Saze et al., 2008). While all eleven cysteine residues can be identified, there are deletions between the 4<sup>th</sup> and 5<sup>th</sup> cysteine and 6<sup>th</sup> and 7<sup>th</sup> cysteine residues. None of the ICF-associated residues are conserved in the class III. One of these class III proteins is IBM1 (increase in bonsai mutation 1), whose mutation causes the dwarf “bonsai” phenotype (Saze et al., 2008), which is accompanied with increased H3K9me2 and DNA methylation levels at the *BONSAI* (*APC13*) locus. Double mutants of *ddm1* and *ibm1* exacerbate the bonsai phenotype, indicating that DDM1 and IBM1 act independently to regulate DNA methylation (Saze et al., 2008). Another class III protein is JMJ24, which harbors a RING finger domain in addition to the 4CXXC and JmjC domains. This RING finger domain promotes ubiquitin-mediated degradation of the DNA methyltransferase CMT3, and thus opposes DNA methylation (Deng et al., 2016).

Homologs of these three classes of CDCA7 proteins found in *Arabidopsis* are widely identified in green plants (Viridiplantae), including Streptophyta (e.g., rice, maize, moss, fern) and Chlorophyta (green algae) (Figure 3–figure supplement 1 and Figure 1–source

data 1). Other variants of zf-4CXXC\_R1 are also found in Viridiplantae. In contrast to green plants, in which the combined presence of HELLS/DDM1-, CDCA7- and DNMT-orthologs is broadly conserved, no zf-4CXXC\_R1-containing proteins can be identified in red algae (Rhodophyta) (Figure 1–source data 1, see Figure 5 and Figure 5–figure supplement 1).

### **Zf-4CXXC\_R1-containing proteins in Fungi**

Although *S. pombe* and *S. cerevisiae* genomes do not encode any CDCA7 family proteins, a BLAST search identified various fungal protein(s) with a zf-4CXXC\_R1 domain. Among the zf-4CXXC\_R1-containing proteins in fungi, 10 species (*Kwoniella mangroviensis*, *Coprinopsis cinere*, *Agaricus bisporus*, *Taphrina deformans*, *Gonapodya prolifera*, *Basidiobolus meristosporus*, *Coemansia reversa*, *Linderina pennispora*, *Rhizophagus irregularis*, *Podila verticillate*) harbor a class II zf-4CXXC\_R1 domain with two notable deviations (Figure 4A). First, the space between the third and fourth cysteine residues is variable. Second, the fifth cysteine is replaced by aspartate in Zoopagomycota (*Basidiobolus meristosporus* ORX82853, *Coemansia reversa* PIA14937, *Linderina pennispora* ORX71196) (Figure 4). As these proteins do not contain any additional CDD-annotated domain like vertebrate and plant CDCA7 orthologs (except for *Taphrina deformans* CCG81269, which also has a CHROMO domain), we define this fungal protein family as CDCA7F, which forms a distinct clade in our phylogenetic analysis of zf-4CXXC\_R1 sequence alignment (Figure 2–figure supplement 1 and Figure 3–figure supplement 1).

Besides CDCA7F, several fungal species encode a protein with a diverged zf-4CXXC\_R1 domain, including those with a JmjC domain at the N-terminus (Figure 4B, Figure 1–source data 1). This composition mimics the plant class III proteins, for which the JmjC domain is located at the C-terminus. Among these proteins, it was suggested that *Neurospora crassa* DMM-1 does not directly regulate DNA methylation or demethylation but rather controls the deposition of histone H2A.Z and/or H3K56 acetylation, which inhibit spreading of heterochromatin segments with methylated DNA and H3K9me3 (Honda et al., 2010; Zhang et al., 2022). Thus, the known roles of these divergent variants of zf-4CXXC\_R1 are not directly associated with DNA methylation.

### **Systematic identification of CDCA7 and HELLS homologs in eukaryotes**

To systematically identify CDCA7 and HELLS homologs in the major eukaryotic supergroups, we conducted a BLAST search against the NCBI protein database using human CDCA7 and HELLS protein sequences. To omit species with a high risk of false negative identification, we selected species containing at least 6 distinct proteins with compelling homology to the SNF2 ATPase domain of HELLS, based on the assumption that each eukaryotic species is expected to have 6-20 SNF2 family ATPases (Flaus et al., 2006). Indeed, even the microsporidial pathogen *Encephalitozoon cuniculi*, whose genome size is a mere 2.9 Mb, contains six SNF2 family ATPases (Flaus et al., 2006). As such, we generated a panel of 180 species encompassing all major eukaryote supergroups (5 Excavata, 18 SAR [2 Rhizaria, 6 Alveolata, 10 Stramenopiles]), 1 Haptista, 1 Cryptista, 15 Archaeplastida [3 Rhodophyta and 12 Viridiplantae], 4 Amoebozoa, 136

Opisthokonts [34 Fungi, 3 Holozoa, and 99 Metazoa]) (Figure 5–figure supplement 1, and Figure 1–source data 1).

To annotate HELLS orthologs, a phylogenetic tree was constructed from a multiple sequence alignment of the HELLS homologs identified based on the RBH criterion alongside other SNF2-family proteins of *H. sapiens*, *D. melanogaster*, *S. cerevisiae*, and *A. thaliana*. If HELLS orthologs are correctly identified (i.e. without erroneously including orthologs of another SNF2-subfamily) they should cluster together in a single clade. However, the sequence alignment using the full-length protein sequence failed to cluster HELLS and DDM1 in the same clade (Figure 5–figure supplement 2). Since HELLS and other SNF2-family proteins have variable insertions within the SNF2 ATPase domain, multiple sequence alignment of the SNF2 domains was then conducted after removing the insertion regions, as previously reported (Flaus et al., 2006). By this SNF2 domain-only alignment method, all HELLS orthologs formed a clade, separated from CHD1, ISWI, SMARCA2/4, SRCAP, and INO80 (Figure 5–figure supplement 3). An independent phylogenetic tree construction with a maximum-likelihood based method and 1000 bootstrap replicates confirmed these assignments (see Methods, Figure 5–source data 1 and Figure 5–source data 2).

A BLAST search with the human CDCA7 sequence across the panel of 180 species identified a variety of proteins containing the zf-4CXXC\_R1 domain, which is prevalent in all major supergroups (Figure 5, Figure 5–figure supplement 1, and Figure 1–source data 1). Each of these identified proteins contains only one zf-4CXXC\_R1 domain. The resulting list of CDCA7 BLAST hits were further classified as prototypical CDCA7 orthologs if they preserve the criteria of the class I zf-4CXXC\_R1 (signature eleven cysteine residues *and* the three ICF-associated residues) (Figure 3–figure supplement 1). A phylogenetic tree analysis of zf-4CXXC\_R1 domains from diverse species confirmed that these CDCA7 orthologs with the class I zf-4CXXC\_R1 domain are clustered under the same clade (Figure 2–figure supplement 1, also see Methods, Figure 2–source data 1 and Figure 2–source data 2). CDCA7 orthologs are broadly found in the three supergroup lineages (Archaeplastida, Amoebozoa, Opisthokonta) (Figure 5, Figure 5–figure supplement 1, and Figure 1–source data 1). In Excavata, the amoeboflagellate *Naegleria gruberi* encodes a protein that is a likely ortholog of CDCA7 with an apparent C-terminal truncation (XP\_002678720), possibly due to a sequencing error (Figure 3–figure supplement 1). In SAR, CDCA7 orthologs are absent from all available genomes, except stramenopile *Tribonema minus*, which encodes a distantly related likely ortholog of CDCA7 (KAG5177154). These conservations suggest that the class I zf-4CXXC\_R1 domain in CDCA7 was inherited from the LECA.

In addition to the class I zf-4CXXC\_R1 domain, we also identified divergent zf-4CXXC\_R1 domains across eukaryotes, although metazoan species only contain CDCA7 orthologs (and their paralogs such as CDCA7L and CDCA7e) with the exception of the sponge *Amphimedon queenslandica*, which also encodes a protein (XP\_019849176) with the class II zf-4CXXC\_R1 domain, DDT, and WHIM1 domain, the composition of which is similar to plant DDR1-3 (Figure 3, Figure 5, Figure 3–figure supplement 1, and Figure 1–source data 1). The Amoebozoa *Acanthamoeba castellanii* encodes a protein

(XP\_004340890) containing the class II zf-4CXXC\_R1 domain as well as the CHROMO domain (cd00024) (Figure 3–figure supplement 1 and Figure 1–source data 1). This domain combination is also found in the *Taphrina deformans* CDCA7F, CCG81269 (Figure 4). Proteins with a combinatory presence of a diverged zf-4CXXC\_R1 domain and the JmjC domain are found in plants, fungi, Amoebozoa, and *Naegleria gruberi* (Figure 1–source data 1).

Despite the prevalence of the zf-4CXXC\_R1 domain and its variants in eukaryotes, no zf-4CXXC\_R1 domain was found in prokaryotes and Archaea. This is in contrast to SNF2 family proteins and DNA methyltransferases, which can be identified in prokaryotes and Archaea (Colot and Rossignol, 1999; Flaus et al., 2006; Huff and Zilberman, 2014; Ponger and Li, 2005), pointing toward a possibility that the zf-4CXXC\_R1 domain emerged to deal with unique requirement of eukaryotic chromatin.

### Classification of DNMTs in eukaryotes

A simple RBH approach is not practical to classify eukaryotic DNMT proteins due to the presence of diverse lineage-specific DNMTs (Huff and Zilberman, 2014). Therefore, we collected proteins with a DNMT domain within the panel of 180 eukaryote species, and then extracted the DNMT domains from each sequence (based on an NCBI conserved domains, Dcm [COG0270], Dcm super family [cl43082], AdoMet\_MTases superfamily [cl17173]). Generating a phylogenetic tree based on the multisequence alignment of the DNMT domains, we were able to classify the majority of all identified DNMTs as previously characterized DNMT subtypes according to their sequence similarity (Figure 5–figure supplement 4, Figure 5–source data 3 and Figure 5–source data 4). These DNMT subtypes include DNMT1; DNMT3; the plant specific *de novo* DNA methyltransferases DRM1-3; the “true” plant DNMT3 orthologs (Yaari et al., 2019); the plant specific CMT (Bewick et al., 2017a); the fungi-specific maintenance methyltransferase Dim-2 and *de novo* methyltransferase DNMT4 (Bewick et al., 2019a; Nai et al., 2020); the SNF2 domain-containing maintenance methyltransferase DNMT5 (Dumesic et al., 2020; Huff and Zilberman, 2014); DNMT6 (a poorly characterized putative DNMT identified in Stramenopiles, Haptista and Chlorophyta) (Huff and Zilberman, 2014), and the tRNA methyltransferase TRDMT1 (also known as DNMT2) (Figure 5–figure supplement 4). In this report, we call a protein DNMT3 if it clusters into the clade including metazoan DNMT3, plant DNMT3, and DRM. We also identified other DNMTs, which did not cluster into these classes. For example, although it has been reported that DNMT6 is identified in *Micromonas* but not in other Chlorophyta species such as *Bathycoccus* and *Ostreococcus* (Huff and Zilberman, 2014), we identified Chlorophyta-specific DNMTs that form a distinct clade, which seems to be diverged from DNMT6 and DNMT3. We temporarily called this class Chlorophyta DNMT6-like (Figure 5–figure supplement 4). Other orphan DNMTs include the *de novo* DNA methyltransferase DNMTX in fungus *Kwoniella mangroviensis* (Catania et al., 2020), and an uncharacterized DNMT in *N. gruberi* (XP\_002682263).

### Coevolution of CDCA7, HELLS and DNMTs

The classification of homologs of CDCA7, HELLS and DNMTs across the panel of 180 eukaryotic species reveals that they are conserved across the major eukaryote

supergroups, but they are also dynamically lost (Figure 5, Figure 5–figure supplement 1 and Figure 1–source data 1). We found 40 species encompassing Excavata, SAR, Amoebozoa, and Opisthokonta that lack CDCA7 (or CDCA7F), HELLS and DNMT1. Species that encode the set of DNMT1, UHRF1, CDCA7 and HELLS are particularly enriched in Viridiplantae and Metazoa. A clear exception in Amoebozoa is *Acanthamoeba castellanii*, whose genome also encodes these four proteins and is reported to have methylated cytosines (Moon et al., 2017). *N. gruberi* is an exceptional example among Excavata species, encoding a putative CDCA7 (XP\_002678720) as well as HELLS; an orphan DNMT protein (XP\_002682263), and a UHRF1-like protein. DNMT1, DNMT3, HELLS and CDCA7 seem to be absent in other Excavata lineages, although Euglenozoa variants of DNMT6 and cytosine methylation are identified in *Trypanosoma brucei* and *Leishmania major* (Huff and Zilberman, 2014; Militello et al., 2008). The yellow-green algae *Tribonema minus* is the only SAR species that encodes a putative CDCA7 (KAG5177154), along with DNMT5 and HELLS (Figure 5, Figure 2\_figure supplement 1, and Figure 3–figure supplement 1).

Among the panel of 180 eukaryote species, we found 82 species that encode CDCA7 (including fungal CDCA7F) (Figure 5–figure supplement 1 and Figure 1–source data 1 tab6). Strikingly, all 82 species containing CDCA7 (or CDCA7F) also harbor HELLS. Almost all CDCA7 encoding species also possess DNMT1. Exceptions are: the yellow-green algae *T. minus* and the Mamiellophyceae lineage of the green algae/Chlorophyta (*Bathycoccus prasinus*, *Ostreococcus lucimarinus*, *Micromonas pusilla*), which lost DNMT1 but possess DNMT5; the amoeboflagellate *N. gruberi*, which encodes an orphan DNMT and UHRF1, and the fungus *T. deformans*, which encodes UHRF1 and DNMT4. In contrast, 20 species (e.g., *S. cerevisiae*) possess only HELLS, while 10 species (e.g. the silk moth *Bombyx mori*) retains only DNMT1 among the set of DNMT1, CDCA7 and HELLS. These observations indicate that the function of CDCA7 is strongly linked to HELLS and DNMT1, such that the presence of CDCA7 depends on HELLS and DNMT1, while CDCA7 is easier to lose than DNMT1 and HELLS. Compared to the apparent HELLS/DNMT1-dependent existence of CDCA7, DNMT3 seems to be more dispensable; besides Fungi, which lack DNMT3, 16 species (e.g., the bed bug *Cimex lectularius* and the red paper wasp *Polistes canadensis*) possess the set of CDCA7, HELLS and DNMT1 but not DNMT3/DNMT3-like proteins (Figure 5–figure supplement 1 and supplementary file tab6).

To quantitatively assess coevolution of DNMTs, CDCA7 and HELLS, we performed CoPAP analysis on the panel of 180 eukaryote species (Figure 6–figure supplement 1)(Cohen et al., 2013). The analysis was complicated due to the lineage-specific diverse DNMT classes (e.g., Dim2, DNMT5, DNMT6 and other plant specific DNMT variants) and divergent variants of zf-4CXXC\_R1. Considering this caveat, we conducted CoPAP analysis of five DNMTs (DNMT1, Dim-2, DNMT3 [including DRM], DNMT5, DNMT6), UHRF1, HELLS, CDCA7, proteins with class II zf-4CXXC\_R1, and proteins with zf-4CXXC\_R1 and JmjC. As fungi-specific CDCA7F contains class II zf-4CXXC\_R1, and all the other class II zf-4CXXC\_R1 containing proteins were identified in species that also possess CDCA7, we conducted CoPAP against two separate lists; in the first list (Figure 6–figure supplement 1A) CDCA7F was included in the CDCA7

category (i.e. considered as a prototypical CDCA7 ortholog in fungi), whereas in the second list (Figure 6–figure supplement 1B) CDCA7F was included in the class II zf-4CXXC\_R1 category. As positive and negative controls for the CoPAP analysis, we also included subunits of the PRC2 complex (EZH1/2, EED and Suz12), and other SNF2 family proteins SMARCA2/SMARCA4, INO80 and RAD54L, which have no direct role related to DNA methylation, respectively. As expected for proteins that act in concert within the same biological pathway, both CoPAP results showed significant coevolution between DNMT1 and UHRF1, as well as between the PRC2 subunits EZH1 and EED. Suz12 did not show a significant linkage to other PRC2 subunits by this analysis, most likely due to a failure in identifying diverged Suz12 orthologs, such as those in *Neurospora* and *Paramecium* (Jamieson et al., 2013; Miro-Pina et al., 2022). The evolutionary linkage between DNMT5 and DNMT6 were also observed (Figure 6–figure supplement 1). In the result of CoPAP analysis against the first list, where CDCA7F was included in the CDCA7 category, CDCA7 exhibited a coevolutionary linkage to DNMT1 (Figure 6–figure supplement 1A). In the second CoPAP, where CDCA7F was included in the class II zf-4CXXC\_R1 category, CDCA7 exhibited linkage to UHRF1 and HELLS (Figure 6–figure supplement 1B). Notably, none of these proteins show an evolutionary association with the PRC2 proteins or other SNF2 family proteins, while the coevolutionary linkage between CDCA7 and the DNMT1-UHRF1 cluster was reproducible.

We next conducted the CoPAP analysis against a panel of 50 Ecdysozoa species, where DNA methylation system is dynamically lost in multiple lineages (Figure 6A) (Bewick et al., 2017b; Engelhardt et al., 2022), yet the annotation of DNMTs, UHRF1, CDCA7 and HELLS is unambiguous. As a negative control, we included INO80, which is dynamically lost in several Ecdysozoa lineages, such as *C. elegans* (Figure 5, Figure 6A and Figure 5–figure supplement 1). As expected, CoPAP analysis showed a highly significant coevolutionary interaction between DNMT1 and UHRF1 (Figure 6B). In addition, HELLS interacts with DNMT1, UHRF1 and CDCA7. In contrast, no linkage from INO80 or DNMT3 was determined. Altogether, these CoPAP analyses reproducibly found coevolutionary linkages between DNMT1-UHRF1 and CDCA7-HELLS, although the exact interaction topology is sensitive to the selection of species and protein classification methods.

### **Loss of CDCA7 in braconid wasps together with DNMT1 or DNMT3**

CoPAP analysis detected the coevolutionary linkage between CDCA7 and DNMT1-UHRF1, rather than DNMT3. We were therefore intrigued by the apparent absence of CDCA7 and DNMT3 in two insect species, the red flour beetle *Tribolium castaneum* and the braconid wasp *Microplitis demolitor*, whose genomic DNA does not have any detectable 5mC despite the presence of DNMT1 (Bewick et al., 2017b; Schulz et al., 2018; Zemach et al., 2010) (Figure 5). To further validate the co-loss of CDCA7 and DNMT1/DNMT3 in insects, we focused on the Hymenoptera clade (including *M. demolitor*), for which genome synteny has been reported (Li et al., 2021). Indeed, a striking synteny is observed in the genome region surrounding CDCA7 among the parasitic wood wasp (*Orussus abietinus*) and Aculeata species (bees *Bombus terrestris* and *Habropoda laboriosa*, and the eusocial wasp *Polistes canadensis*), which diverged

~250 MYA (Li et al., 2021; Peters et al., 2017) (Figure 7 and Figure 7–source data 1). In these species, CDCA7 is located between Methyltransferase-like protein 25 homolog (MET25, E) and Ornithine aminotransferase homolog (OAT, F). In fact, the gene cluster containing LTO1 homolog (D), MET25 (E), OAT (F), and Zinc finger protein 808 (ZN808, G) is highly conserved in all the analyzed Hymenoptera species, but not outside of Hymenoptera (e.g., *Drosophila*).

However, CDCA7 is absent from this gene cluster in parasitoid wasps, including Ichneumonoidea wasps (braconid wasps [*M. demolitor*, *Cotesia glomerata*, *Aphidius gifuensis*, *Fopius arisanus*] and ichneumon wasp [*Venturia canescens*]) and chalcid wasps (*Copidosoma floridanum*, *Nasonia vitripennis*) (Figure 7 and Figure 7–source data 2). Among Ichneumonoidea wasps, CDCA7 is undetectable in the genome of braconid wasps, while CDCA7 is located on a different chromosome in the ichneumon wasp *Venturia canescens*. In chalcid wasps, CDCA7 is present at a genome segment between Artemis (I) and Chromatin accessibility complex protein 1 (CHRC1, J). Supported by the chromosome-level genome assembly for *Cotesia glomerata* and *Aphidius gifuensis* (Feng et al., 2020; Pinto et al., 2021), the synteny analysis strongly indicates that CDCA7 is lost from braconid wasps. Intriguingly, braconid wasps co-lost CDCA7 either with DNMT3 (in *M. demolitor*, *Cotesia glomerata*, *Cotesia typhae* and *Chelonus insularis*) or with DNMT1 and UHRF1 (in *Fopius arisanus*, *Diachasma alloeum* and *Aphidius gifuensis*) (Figure 7 and Figure 7–source data 2). Notably, in addition to *M. demolitor* (which lacks CDCA7 and DNMT3), it has been reported that little or no 5mC can be detected in *Aphidius ervi* (which lacks CDCA7, DNMT1 and UHRF1, Figure 7–source data 2) (Bewick et al., 2017b). In contrast, all Hymenoptera species that are known to have detectable 5mC possess CDCA7 along with DNMT1, UHRF1, DNMT3, and HELLS, except for *Polistes canadensis*, which has all but DNMT3 (Figure 7 and Figure 7–source data 2). This co-loss of CDCA7 and DNA methylation (together with either DNMT1-UHRF1 or DNMT3) in braconid wasps suggests that evolutionary preservation of CDCA7 is more sensitive to DNA methylation status *per se* than to the presence or absence of a particular DNMT subtype. Consistent with this idea, among the panel of 180 eukaryote species, none of the 17 species where absence of genomic 5mC has been experimentally shown encodes CDCA7 (Figure 1–source data 1 tab8) (Aliaga et al., 2019; Antequera et al., 1984; Bewick et al., 2019a; Bewick et al., 2017b; Cock et al., 2010; Engelhardt et al., 2022; Geyer et al., 2011; Mondo et al., 2017; Noordhoek et al., 2018; Schulz et al., 2018; Singh et al., 2018; Zemach et al., 2010).

## Discussion

Although DNA methylation is prevalent across eukaryotes, DNA methyltransferases are missing from a variety of lineages. Our study reveals that the nucleosome remodeling complex CHIRRC, composed of CDCA7 and HELLS, is frequently lost in conjunction with DNA methylation status. More specifically, evolutionary preservation of CDCA7 is tightly coupled to the presence of HELLS and DNMT1-UHRF1. The conservation of CDCA7's signature cysteine residues alongside three ICF-associated residues across diverse eukaryote lineages suggests a unique evolutionary conserved role in DNA methylation. Our co-evolution analysis suggests that DNA methylation-related functionalities of CDCA7 and HELLS are inherited from LECA.

The evolutionary coupling of CDCA7, HELLS and DNMT1 is consistent with a proposed role of HELLS in replication-uncoupled DNA methylation maintenance (Ming et al., 2020). Commonly, DNA methylation maintenance occurs directly behind the DNA replication fork. Replication-uncoupled DNA methylation maintenance is distinct from this process (Nishiyama et al., 2020), and HELLS and CDCA7 may be important for the maintenance of DNA methylation long after the completion of DNA replication, particularly at heterochromatin where chromatin has restricted accessibility (Ming et al., 2020). The tighter evolutionary coupling of CDCA7-HELLS to DNMT1 rather than to DNMT3 may also reflect a potential capacity of CDCA7 in sensing DNA methylation, similar to the way that the zf-CXXC domain is sensitive to CpG methylation (Long et al., 2013), but in a replication-coupled manner. However, this does not necessarily suggest that the role of CDCA7 is always coupled to maintenance DNA methylation.

The loss of CDCA7 is not always coupled to the loss of DNMT1 or HELLS. In the Hymenoptera clade, CDCA7 loss in the braconid wasps is accompanied with the loss of DNMT1/UHRF1 or the loss of DNMT3. Among these species, it was reported that 5mC DNA methylation is undetectable in *M. demolitor*, which harbors DNMT1, UHRF1 and HELLS but lost DNMT3 and CDCA7 (Bewick et al., 2017b). Similarly, in the Coleoptera clade, the red flour beetle *T. castaneum* possesses DNMT1 and HELLS, but lost DNMT3 and CDCA7 (Figure 6A and Figure 1–source data 1). Since DNMT1 is essential for the embryonic development of *T. castaneum* and CpG DNA methylation is undetectable in this organism (Schulz et al., 2018), it has been predicted that DNMT1 has a function independent of DNA methylation in this species. Indeed, species that preserves DNMTs and/or HELLS in the absence of CDCA7 emerge repeatedly during eukaryote evolution, whereas CDCA7 appears to be immediately dispensable in species that have a dampened requirement for DNA methylation. In other words, there is no evolutionary advantage to retain CDCA7 in the absence of DNA methylation, and CDCA7 is almost never maintained in the absence of any DNMTs. Alternatively, could the loss of CDCA7 precede the loss of DNA methylation? If CDCA7 is important to promote DNA methylation maintenance, the loss of CDCA7 may exacerbate an impaired epigenetic environment and stimulate the adaptation of the organism towards DNA methylation-independent epigenetic mechanisms, thereby decreasing the necessity to maintain the DNA methylation system. In this way, the loss of CDCA7 could trigger the subsequent loss of DNMTs (and HELLS), unless these proteins acquired important DNA methylation-independent roles. In line with this scenario, insects, whose DNA methylation is largely limited to gene bodies, possess robust DNA methylation-independent mechanisms (such as piwi-RNA and H3K9me3) to silence transposons (Bonasio et al., 2012; Feng et al., 2010; Libbrecht et al., 2016; Wang et al., 2013; Zemach et al., 2010). The loss of CDCA7 is more frequently observed in insects than plants and vertebrates, where DNA methylation and HELLS/DDM1 play major roles in silencing transposons. (Czech et al., 2018; Dunican et al., 2013; Huang et al., 2004; Kato et al., 2003; Miura et al., 2001; Onishi et al., 2021; Osakabe et al., 2021; Vongs et al., 1993). Thus, lowering the demand of DNA methylation at transposable elements might reduce the essentiality of CDCA7 (and then perhaps that of DNMTs), though it is difficult to deduce which evolutionary change occurs first.

Considering the importance of HELLS/DDM1 in silencing transposable elements, it is intriguing that CDCA7, HELLS, and DNMT1 are conserved in many insects, in which transposable elements are generally hypomethylated (Bonasio et al., 2012; Feng et al., 2010; Libbrecht et al., 2016; Wang et al., 2013; Zemach et al., 2010). DNMT1 knockout in the clonal raider ant, *Ooceraea biroi*, which has a full set of DNMT1, UHRF1, DNMT3, CDCA7 and HELLS (Figure 7), does not cause major developmental defects but leads to failure in reproductive oogenesis and compromised longevity (Ivasyk et al., 2023). Similarly, DNMT1 is essential for meiosis (but not for repression of transposable elements) in the milkweed bug *Oncopeltus fasciatus* (Bewick et al., 2019b; Washington et al., 2021). HELLS and DNMT1 are also important for meiotic progression in mice (Baumann et al., 2020; Spruce et al., 2020; Takada et al., 2021; Zeng et al., 2011). In *Neurospora*, DNA methylation is a critical component for trans-sensing homologous chromosomes during meiosis (Pratt et al., 2004). Since 5mC is highly mutagenic and DNA methylation patterns are altered during aging (Lowe et al., 2018; Wang et al., 2020), it is tempting to speculate that the precise maintenance of DNA methylation patterns may act as a hallmark to distinguish between young/healthy DNA and old/mutated (or competitive/pathogenic) DNA during meiosis, perhaps in a way analogous to the role of methylated DNA for mismatch repair in bacteria (Schofield and Hsieh, 2003).

The observation that some species retain HELLS but lose CDCA7 (while the reverse is never true) suggests that HELLS can evolve a CDCA7-independent function. Indeed, it has been suggested that the sequence-specific DNA-binding protein PRDM9 recruits HELLS to meiotic chromatin to promote DNA double-strand breaks and recombination (Imai et al., 2020; Spruce et al., 2020). Unlike CDCA7, clear PRDM9 orthologs are found only in metazoans, and are even lost in some vertebrates such as *Xenopus laevis* and *Gallus gallus* (Birtle and Ponting, 2006). Thus, it is plausible that HELLS gained a species-specific CDCA7-independent role during evolution through acquiring a new interaction partner. Another example of this may be found in *S. cerevisiae*, where DNA methylation and CDCA7 are absent and the HELLS homolog Irc5 interacts with cohesin to facilitate its chromatin loading (Litwin et al., 2017). In *Neurospora*, where genomic DNA is methylated, the HELLS homolog MUS-30 is not required for DNA methylation but plays a role in DNA damage responses (Basenko et al., 2016). We speculate that the role of CDCA7 is evolutionarily more tightly coupled to DNA methylation than HELLS is.

Recently, the role of HELLS in the deposition of the histone variant macroH2A, which compacts chromatin, has been reported in mice (Ni and Muegge, 2021; Ni et al., 2020; Xu et al., 2021). Similarly, in *Arabidopsis*, DDM1 is critical for deposition of H2A.W, which is enriched on heterochromatin, in a manner independent of DNA methylation (Osakabe et al., 2021). The role of CDCA7 in the deposition of these H2A variants remains to be tested. HELLS and DDM1 can directly interact with macroH2A and H2A.W, respectively, even in the absence of CDCA7 (Ni and Muegge, 2021; Osakabe et al., 2021). It is thus possible that HELLS/DDM1 family proteins have an evolutionary conserved function in H2A variant deposition independent of CDCA7 and DNA

methylation. However, there is no clear indication of coevolution of HELLS and macroH2A, as macroH2A is largely missing from insects and the chelicerata *Centruroides sculpturatus* has macroH2A (XP\_023217082, XP\_023212717) but lost HELLS and CDCA7.

Whereas CDCA7-like proteins with class I zf-4CXXC\_R1 are evolutionarily coupled to HELLS and DNMT1-UHRF1, other variants of zf-4CXXC\_R1 are widespread in eukaryotes except for metazoans, which encode only CDCA7 orthologs and their close paralogs (with the exception of the sponge *A. queenslandica*). Proteins containing a diverged variant of zf-4CXXC\_R1 and the JmjC domain, such as IBM1 in Arabidopsis and DMM-1 in Neurospora, are broadly found in Viridiplantae and Fungi (Honda et al., 2010; Saze et al., 2008; Zhang et al., 2022). Functional studies of IBM1 and DMM-1 suggested that they contribute to DNA methylation regulation via indirect mechanisms. As IBM1 and DMM-1 do not preserve ICF-associated residues, which are critical for nucleosome binding in CDCA7 (Jenness et al., 2018), it is likely that these variants of zf-4CXXC\_R1 are adapted to recognize different structural features of the genome and no longer preserve the DNA methylation function of CDCA7 orthologs.

Considering the broad conservation of DNA methylation in vertebrates (Hemmi et al., 2000; Kondilis-Mangum and Wade, 2013), plants (Deleris et al., 2016), prokaryotes (Beaulaurier et al., 2019; Casadesus and Low, 2006; Dimitriu et al., 2020; Vasu and Nagaraja, 2013) and Archaea (Grogan, 2003; Hayashi et al., 2021; Ishikawa et al., 2005; Prangishvili et al., 1985), along with the existence of SNF2-like proteins (SSO1653) in prokaryotes and Archaea (Flaus et al., 2006), we hypothesize that the evolutionary advent of zf-4CXXC\_R1-containing CDCA7 was a key step to transmit the DNA methylation system from the last universal common ancestor (LUCA) to the eukaryotic ancestor with nucleosome-containing genomes.

## Methods

| Key Resources Table |             |                                                                             |                           |
|---------------------|-------------|-----------------------------------------------------------------------------|---------------------------|
| Resource type       | Designation | Source or reference                                                         | Identifiers               |
| Software, algorithm | MacVector   | MacVector, Inc.                                                             | Version 16 - 18           |
| Software, algorithm | Muscle      | <a href="https://www.drive5.com/muscle/">https://www.drive5.com/muscle/</a> | Muscle5.1                 |
| Software, algorithm | IQ-TREE     | <a href="http://www.iqtree.org/">http://www.iqtree.org/</a>                 | Version 2.0.3 and 2.2.2.6 |
| Software, algorithm | Timetree    | <a href="http://www.timetree.org/">http://www.timetree.org/</a>             | Version 5                 |
| Software, algorithm | phylot      | <a href="https://phylot.biobyte.de/">https://phylot.biobyte.de/</a>         | Version 2                 |
| Software, algorithm | iTOL        | <a href="https://itol.embl.de/">https://itol.embl.de/</a>                   | Version 6                 |

|                     |             |                                                                                   |                  |
|---------------------|-------------|-----------------------------------------------------------------------------------|------------------|
| Software, algorithm | CoPAP       | <a href="http://copap.tau.ac.il/source.php">http://copap.tau.ac.il/source.php</a> |                  |
| Software, algorithm | ETE Toolkit | <a href="http://etetoolkit.org/">http://etetoolkit.org/</a>                       |                  |
| Software, algorithm | Jalview     | <a href="https://www.jalview.org/">https://www.jalview.org/</a>                   | Version 2.22.2.7 |

### Building a curated list of 180 species for analysis of evolutionary co-selection

A list of 180 eukaryote species was manually generated to encompass broad eukaryote evolutionary clades (Figure 1–source data 1). Species were included in this list based on two criteria: (i) the identification UBA1 and PCNA homologs, two highly conserved and essential proteins for cell proliferation; and (ii) the identification of more than 6 distinct SNF2 family sequences. Homologs of CDCA7, HELLS, UBA1 and PCNA were identified by BLAST search against the Genbank eukaryote protein database available at National Center for Biotechnology Information using the human protein sequence as a query (NCBI). Homologs of human UHRF1, ZBTB24, SMARCA2/SMARCA4, INO80, RAD54L, EZH2, EED or Suz12 were also identified based on the RBH criterion. To get a sense of genome assembly level of each genome sequence, we divided “Total Sequence Length” by “Contig N50” (“length such that sequence contigs of this length or longer include half the bases of the assembly”; <https://www.ncbi.nlm.nih.gov/assembly/help/>). In the species whose genome assembly level is labeled as “complete”, this value is close to the total number of chromosomes or linkage groups. As such, as a rule of thumb, we arbitrarily defined the genome assembly “preliminary”, if this value is larger than 100. In Figure 5, these species with preliminary-level genome assembly were noted as boxes with dotted outlines.

### CDCA7 homolog identification and annotation

BLAST search was conducted using human CDCA7 (NP\_114148) as the search query against NCBI protein database. The obtained list of CDCA7 homologs was classified based on the conservation of eleven cysteine and three ICF-associated residues in the zf-4CXXC\_R1 domain, as described in Results. This classification was further validated based on their clustering in a phylogenetic tree built from the CLUSTALW alignment of the zf-4CXXC\_R1 domain identified by NCBI conserved domains search (Higgins and Sharp, 1988; Lu et al., 2020; Thompson et al., 1994) (Fig S1), using MacVector (MacVector, Inc.). Jalview was used to color-code amino acids based on conservation and amino acid types (Waterhouse et al., 2009). The cluster of class I zf-4CXXC\_R1 domain-containing proteins (where all three ICF-associated residues are conserved) was segregated from other variants of zf-4CXXC\_R1-containing proteins except for the moss *Physcomitrium* XP\_024393821 and green algae *Bathycoccus* XP\_007512509 and *Chlamydomonas* GAX81623, which has class II zf-4CXXC-R1 (where the ICF-associated glycine residue is substituted). To further assess this validation, another phylogenetic tree was built by the optimal maximum likelihood-based model selected by IQ-TREE 2.2.2.6 (Minh et al., 2020), using the zf-4CXXC\_R1 domain alignment generated and selected by Muscle v5 (Figure 2–source data 1)(Edgar, 2022). A consensus tree was then constructed from 1000 bootstrap trees using UFBoot2 (Figure 2–source data 2) (Hoang et al., 2018). The phylogenetic tree built by this second method deviated

all class II and other zf-4CXXC\_R1 variants from CDCA7 orthologs with class I zf-4CXXC\_R1 (Figure 2–source data 2).

#### HELLS homolog identification and annotation

HELLS homologs were first identified according to the RBH criterion. Briefly, a BLAST search was conducted using human HELLS as the query sequence, after which protein sequences of obtained top hits (or secondary hits, if necessary) in each search were used as a query sequence to conduct reciprocal BLAST search against the *Homo sapiens* protein database. If the top hit in the reciprocal search returned the original input sequence (i.e. human HELLS), it was temporarily annotated as an orthologous protein. If HELLS showed up as a next best hit, it is temporarily listed as a “potential HELLS ortholog”. To further validate the identified HELLS orthologs, full length amino acid sequences of these proteins were aligned using CLUSTALW in MacVector with homologs of the Snf2 family proteins SMARCA2/SMARCA4, CHD1/CHD3/CHD7, ISWI, RAD54L, ATRX, HLTF, TTF2, SHPRH, INO80, SMARCA1, SWR1, MOT1, ERCC6, and SMARCA1, which were also identified and temporarily annotated with a similar reciprocal BLAST search methods. The phylogenetic tree generated by this full-length alignment separated the clade containing HELLS, DDM1, INO80, SMARCA2/SMARCA4, CHD1/CDH3/CHD7, and ISWI from other Snf2 family proteins (Figure 5–figure supplement 2). This alignment was used to define the conserved SNF2 domain and variable linker regions in the putative HELLS orthologs and other homologous SNF2-family proteins (INO80, SMARCA2/SMARCA4, CHD1/CDH3/CHD7, and ISWI). The variable linker regions were then removed from selected proteins for each kingdom/phylum to conduct the secondary CLUSTALW alignment in MacVector, from which a phylogenetic tree was generated (Figure 5–figure supplement 3). A distinct cluster of HELLS and other SNF2 family proteins can be identified from the phylogenetic tree, hence confirming that the annotation of HELLS orthologs based on the reciprocal BLAST search method is reasonable. Exceptions are *Leucosporidium creatinivorum* ORY88017 and ORY88018, which did not cluster within the HELLS clade of the phylogenetic tree. However, we decided to annotate *L. creatinivorum* ORY88017 and ORY88018 as HELLS orthologs since among other *L. creatinivorum* SNF2-family proteins in this species these two proteins are most similar to human HELLS while clear orthologs of other *L. creatinivorum* SNF2 family proteins, CHD1 (ORY55731), ISWI (ORY89162), SMARCA2/4 (ORY76015), SRCAP/SWR1 (ORY90750) and INO80 (ORY91599), can be identified. To further validate the phylogenetic tree generated in Figure 5–figure supplement 3, another phylogenetic tree was built by the optimal maximum likelihood-based model selected by IQ-TREE 2.2.2.6 (Minh et al., 2020), using the alignment generated and selected by Muscle v5 (Figure 5–source data 1) (Edgar, 2022). A consensus tree was then constructed from 1000 bootstrap trees using UFBoot2 (Figure 5–source data 2) (Hoang et al., 2018). The topology of the phylogenetic tree build by this second method was consistent with the original tree shown in Figure 5–figure supplement 3.

#### DNMT homolog identification and annotation

Proteins with a DNA methyltransferase domain were identified with BLAST searches using human DNMT1 and DNMT3A. Additional BLAST searches were conducted using

human DNMT2, *C. neoformans* DNMT5, *N. crassa* Dim-2 and DNMT4, *Thalassiosira pseudonana* DNMT6 (XP\_002287631) (Huff and Zilberman, 2014), and *Kwoniella mangroviensis* DNMTX (XP\_019001759) (Catania et al., 2020). DNMT domains were extracted from selected proteins that represent each kingdom/phylum and DNMT type (including ambiguous classes) based on a NCBI conserved domains search and were aligned with CLUSTALW to build a phylogenetic tree in MacVector. To further assess this validation, another phylogenetic tree was built by the optimal maximum likelihood-based model selected by IQ-TREE 2.0.3 (Minh et al., 2020), using the alignment generated and selected by Muscle v5 (Figure 5—source data 3) (Edgar, 2022). A consensus tree was then constructed from 1000 bootstrap trees using UFBoot2 (Figure 5—source data 4) (Hoang et al., 2018). The topology of the phylogenetic tree built by this second method was largely consistent with the original tree except for placement of orphan DNMTs. In both trees, *Vitrella brassicaformis* CEM15752, *Fragilariopsis cylindrus* OEU08290, OEU15938, *Thalassiosira pseudonana* XP\_002295472, and *Tribonema minus* KAG5185060 form a clade, which, only in the IQ-TREE generated tree, splits from the canonical DNMT4 clade. As proteins in this clade have been previously annotated as DNMT4 (Huff and Zilberman, 2014), we followed this classification and present this IQ-TREE-based phylogenetic tree of DNMTs in Figure 5—figure supplement 4, which was illustrated using the ETE3 toolkit.

### CoPAP

The published method was used (Cohen et al., 2013). The curated list of orthologous proteins listed in Figure 1—source data 1 was first used to generate a presence-absence FASTA file. Next, a phylogenetic species tree was generated from all orthologous protein sequences listed in Figure 1—source data 1 using the ETE3 toolkit. For this, protein sequences were retrieved using the rentrez Bioconductor package and exported to a FASTA file alongside a COG file containing gene to orthologous group mappings. ETE3 was used with the parameters `-w clustalo_default-trimal01-none-none` and `-m cog_all_alg_concat_default-fasttree_default` and the resulting tree exported in Newick format. CoPAP was run using default parameters and results visualized using Cytoscape. Code and files required for CoPAP input generation as well CoPAP parameters and output results can be found in our Github repository ([https://github.com/RockefellerUniversity/Copap\\_Analysis](https://github.com/RockefellerUniversity/Copap_Analysis)). A method to calculate *p*-value for CoPAP was described previously (Cohen et al., 2012). Briefly, for each pair of tested genes, Pearson's correlation coefficient was computed. Parametric bootstrapping was used to compute a *p*-value by comparing it with a simulated correlation coefficient calculated based on a null distribution of independently evolving pairs with a comparable exchangeability (a value reporting the likelihood of gene gain and loss events across the tree)

As negative and positive controls for the CoPAP analysis, we identified several well-conserved protein orthologs across the panel of 180 eukaryotic species, including Snf2-like proteins SMARCA2/SMARCA4, INO80, and RAD54L (Flaus et al., 2006), as well as subunits of the polycomb repressive complex 2 (PRC2), which plays an evolutionary conserved role in gene repression via deposition of the H3K27me3 mark. PRC2 is conserved in species where DNMTs are absent (including in *D. melanogaster* and *C.*

*elegans*) but is frequently lost particularly in several lineages of SAR and Fungi (Sharaf et al., 2022). Among the four core subunits of PRC2, we focused on the catalytic subunit EZH1/2, EED, and SUZ12, since the fourth subunit RbAp46/48 has a PRC2-independent role (Margueron and Reinberg, 2011). We are aware that the reciprocal BLAST search missed previously reported highly divergent functional orthologs of SUZ12 in *Neurospora* (Jamieson et al., 2013), and EED and Suz12 in *Paramecium* (Miro-Pina et al., 2022). However, we did not attempt to use these divergent homologs of EED and SUZ12 as baits to expand our search in order to consistently apply our homology-based definition of orthologs.

### Hymenoptera synteny analysis

The mapping of gene loci is based on the information available on the Genome Data Viewer (<https://www.ncbi.nlm.nih.gov/genome/gdv>). Genome positions of listed genes are summarized in Figure 7—source data 1.

### **Artworks**

Artworks of species images were obtained from PhyloPic.com, of which images of *Daphnia*, *Platyhelminthes*, *Tribolium* and *Volvox* were generated by Mathilde Cordellier, Christopher Laumer/T. Michael Keeseey, Gregor Bucher/Max Farnworth and Matt-Crook, respectively.

### **Acknowledgements**

We thank Daniel Kronauer and Rochelle Shih for critical reading of the manuscript, and D. Kronauer, Li Zhao, Junhui Peng and Erick Jarvis for helpful discussion. We thank Yasuhiro Arimura and Hideaki Konishi for their assistance in multiple sequence alignment and phylogenetic tree generation. The research by Q. J. was in part executed through Chemers Neustein Summer Undergraduate Research Fellowship (SURF) Program at the Rockefeller University.

### **Funding**

This work was supported by National Institutes of Health Grants R35GM132111 to H.F., and the Women & Science Postdoctoral Fellowship Program at The Rockefeller University to I.E.W.

### **Competing interests**

H.F. is affiliated with Graduate School of Medical Sciences, Weill Cornell Medicine, and Cell Biology Program, the Sloan Kettering Institute. The authors declare that no competing financial interests exist.

### **Authors' Contribution**

H. F., Conceptualization, Data curation, Funding acquisition, Investigation, Project administration, Supervision, Visualization, Writing – original draft, Writing – review & editing; I.E.W., Funding acquisition, Investigation, Supervision, Writing – review & editing; Q.J., Data curation, Investigation, Visualization; J.L., Data curation, Methodology, Software; T.C., Data curation, Methodology, Software.

## References

- Aliaga, B., Bulla, I., Mouahid, G., Duval, D., and Grunau, C. (2019). Universality of the DNA methylation codes in Eucaryotes. *Sci Rep* 9, 173.
- Antequera, F., Tamame, M., Villanueva, J.R., and Santos, T. (1984). DNA methylation in the fungi. *The Journal of biological chemistry* 259, 8033-8036.
- Aravind, L., and Iyer, L.M. (2012). The HARE-HTH and associated domains: novel modules in the coordination of epigenetic DNA and protein modifications. *Cell Cycle* 11, 119-131.
- Basenko, E.Y., Kamei, M., Ji, L., Schmitz, R.J., and Lewis, Z.A. (2016). The LSH/DDM1 Homolog MUS-30 Is Required for Genome Stability, but Not for DNA Methylation in *Neurospora crassa*. *PLoS Genet* 12, e1005790.
- Baumann, C., Ma, W., Wang, X., Kandasamy, M.K., Viveiros, M.M., and De La Fuente, R. (2020). Helicase LSH/Hells regulates kinetochore function, histone H3/Thr3 phosphorylation and centromere transcription during oocyte meiosis. *Nature communications* 11, 4486.
- Beaulaurier, J., Schadt, E.E., and Fang, G. (2019). Deciphering bacterial epigenomes using modern sequencing technologies. *Nat Rev Genet* 20, 157-172.
- Bewick, A.J., Hofmeister, B.T., Powers, R.A., Mondo, S.J., Grigoriev, I.V., James, T.Y., Stajich, J.E., and Schmitz, R.J. (2019a). Diversity of cytosine methylation across the fungal tree of life. *Nat Ecol Evol* 3, 479-490.
- Bewick, A.J., Niederhuth, C.E., Ji, L., Rohr, N.A., Griffin, P.T., Leebens-Mack, J., and Schmitz, R.J. (2017a). The evolution of CHROMOMETHYLASES and gene body DNA methylation in plants. *Genome Biol* 18, 65.
- Bewick, A.J., Sanchez, Z., McKinney, E.C., Moore, A.J., Moore, P.J., and Schmitz, R.J. (2019b). Dnmt1 is essential for egg production and embryo viability in the large milkweed bug, *Oncopeltus fasciatus*. *Epigenetics Chromatin* 12, 6.
- Bewick, A.J., Vogel, K.J., Moore, A.J., and Schmitz, R.J. (2017b). Evolution of DNA Methylation across Insects. *Mol Biol Evol* 34, 654-665.
- Birtle, Z., and Ponting, C.P. (2006). Meisetz and the birth of the KRAB motif. *Bioinformatics* 22, 2841-2845.
- Bonasio, R., Li, Q., Lian, J., Mutti, N.S., Jin, L., Zhao, H., Zhang, P., Wen, P., Xiang, H., Ding, Y., *et al.* (2012). Genome-wide and caste-specific DNA methylomes of the ants *Camponotus floridanus* and *Harpegnathos saltator*. *Current biology : CB* 22, 1755-1764.
- Cao, X., Springer, N.M., Muszynski, M.G., Phillips, R.L., Kaeppler, S., and Jacobsen, S.E. (2000). Conserved plant genes with similarity to mammalian de novo DNA methyltransferases. *Proc Natl Acad Sci U S A* 97, 4979-4984.
- Casadesus, J., and Low, D. (2006). Epigenetic gene regulation in the bacterial world. *Microbiol Mol Biol Rev* 70, 830-856.
- Catania, S., Dumesic, P.A., Pimentel, H., Nasif, A., Stoddard, C.I., Burke, J.E., Diedrich, J.K., Cooke, S., Shea, T., Gienger, E., *et al.* (2020). Evolutionary Persistence of DNA Methylation for Millions of Years after Ancient Loss of a De Novo Methyltransferase. *Cell* 180, 816.
- Chan, S.W., Henderson, I.R., and Jacobsen, S.E. (2005). Gardening the genome: DNA methylation in *Arabidopsis thaliana*. *Nat Rev Genet* 6, 351-360.
- Chen, K., Ou, X.M., Chen, G., Choi, S.H., and Shih, J.C. (2005). R1, a novel repressor of the human monoamine oxidase A. *The Journal of biological chemistry* 280, 11552-11559.
- Choi, J., Lyons, D.B., Kim, M.Y., Moore, J.D., and Zilberman, D. (2020). DNA Methylation and Histone H1 Jointly Repress Transposable Elements and Aberrant Intragenic Transcripts. *Mol Cell* 77, 310-323 e317.

- Cock, J.M., Sterck, L., Rouze, P., Scornet, D., Allen, A.E., Amoutzias, G., Anthouard, V., Artiguenave, F., Aury, J.M., Badger, J.H., *et al.* (2010). The Ectocarpus genome and the independent evolution of multicellularity in brown algae. *Nature* **465**, 617-621.
- Cohen, O., Ashkenazy, H., Burstein, D., and Pupko, T. (2012). Uncovering the co-evolutionary network among prokaryotic genes. *Bioinformatics* **28**, i389-i394.
- Cohen, O., Ashkenazy, H., Levy Karin, E., Burstein, D., and Pupko, T. (2013). CoPAP: Coevolution of presence-absence patterns. *Nucleic Acids Res* **41**, W232-237.
- Colot, V., and Rossignol, J.L. (1999). Eukaryotic DNA methylation as an evolutionary device. *Bioessays* **21**, 402-411.
- Czech, B., Munafo, M., Ciabrelli, F., Eastwood, E.L., Fabry, M.H., Kneuss, E., and Hannon, G.J. (2018). piRNA-Guided Genome Defense: From Biogenesis to Silencing. *Annu Rev Genet* **52**, 131-157.
- de Greef, J.C., Wang, J., Balog, J., den Dunnen, J.T., Frants, R.R., Straasheijm, K.R., Aytakin, C., van der Burg, M., Duprez, L., Ferster, A., *et al.* (2011). Mutations in ZBTB24 are associated with immunodeficiency, centromeric instability, and facial anomalies syndrome type 2. *Am J Hum Genet* **88**, 796-804.
- de Mendoza, A., Bonnet, A., Vargas-Landin, D.B., Ji, N., Li, H., Yang, F., Li, L., Hori, K., Pflueger, J., Buckberry, S., *et al.* (2018). Recurrent acquisition of cytosine methyltransferases into eukaryotic retrotransposons. *Nature communications* **9**, 1341.
- Deleris, A., Halter, T., and Navarro, L. (2016). DNA Methylation and Demethylation in Plant Immunity. *Annu Rev Phytopathol* **54**, 579-603.
- Deng, S., Jang, I.C., Su, L., Xu, J., and Chua, N.H. (2016). JMJ24 targets CHROMOMETHYLASE3 for proteasomal degradation in Arabidopsis. *Genes Dev* **30**, 251-256.
- Deniz, O., Frost, J.M., and Branco, M.R. (2019). Regulation of transposable elements by DNA modifications. *Nat Rev Genet* **20**, 417-431.
- Dennis, K., Fan, T., Geiman, T., Yan, Q., and Muegge, K. (2001). Lsh, a member of the SNF2 family, is required for genome-wide methylation. *Genes Dev* **15**, 2940-2944.
- Dimitriu, T., Szczelkun, M.D., and Westra, E.R. (2020). Evolutionary Ecology and Interplay of Prokaryotic Innate and Adaptive Immune Systems. *Current biology : CB* **30**, R1189-R1202.
- Dong, J., Gao, Z., Liu, S., Li, G., Yang, Z., Huang, H., and Xu, L. (2013). SLIDE, the protein interacting domain of Imitation Switch remodelers, binds DDT-domain proteins of different subfamilies in chromatin remodeling complexes. *J Integr Plant Biol* **55**, 928-937.
- Dumesic, P.A., Stoddard, C.I., Catania, S., Narlikar, G.J., and Madhani, H.D. (2020). ATP Hydrolysis by the SNF2 Domain of Dnmt5 Is Coupled to Both Specific Recognition and Modification of Hemimethylated DNA. *Mol Cell* **79**, 127-139 e124.
- Dunican, D.S., Cruickshanks, H.A., Suzuki, M., Semple, C.A., Davey, T., Arceci, R.J., Greally, J., Adams, I.R., and Meehan, R.R. (2013). Lsh regulates LTR retrotransposon repression independently of Dnmt3b function. *Genome Biol* **14**, R146.
- Dunican, D.S., Pennings, S., and Meehan, R.R. (2015). Lsh Is Essential for Maintaining Global DNA Methylation Levels in Amphibia and Fish and Interacts Directly with Dnmt1. *Biomed Res Int* **2015**, 740637.
- Edgar, R.C. (2022). High-accuracy alignment ensembles enable unbiased assessments of sequence homology and phylogeny. *bioRxiv*, 2021.2006.2020.449169.
- Ehrlich, M. (2003). The ICF syndrome, a DNA methyltransferase 3B deficiency and immunodeficiency disease. *Clin Immunol* **109**, 17-28.
- Ehrlich, M., Jackson, K., and Weemaes, C. (2006). Immunodeficiency, centromeric region instability, facial anomalies syndrome (ICF). *Orphanet J Rare Dis* **1**, 2.
- Engelhardt, J., Scheer, O., Stadler, P.F., and Prohaska, S.J. (2022). Evolution of DNA Methylation Across Ecdysozoa. *J Mol Evol* **90**, 56-72.

- Felle, M., Hoffmeister, H., Rothhammer, J., Fuchs, A., Exler, J.H., and Langst, G. (2011). Nucleosomes protect DNA from DNA methylation in vivo and in vitro. *Nucleic Acids Res* 39, 6956-6969.
- Feng, S., Cokus, S.J., Zhang, X., Chen, P.Y., Bostick, M., Goll, M.G., Hetzel, J., Jain, J., Strauss, S.H., Halpern, M.E., *et al.* (2010). Conservation and divergence of methylation patterning in plants and animals. *Proc Natl Acad Sci U S A* 107, 8689-8694.
- Feng, Z., Wu, Y., Yang, C., Gu, X., Wilson, J.J., Li, H., Cai, W., Yang, H., and Song, F. (2020). Evolution of tRNA gene rearrangement in the mitochondrial genome of ichneumonoid wasps (Hymenoptera: Ichneumonoidea). *Int J Biol Macromol* 164, 540-547.
- Flaus, A., Martin, D.M., Barton, G.J., and Owen-Hughes, T. (2006). Identification of multiple distinct Snf2 subfamilies with conserved structural motifs. *Nucleic Acids Res* 34, 2887-2905.
- Geyer, K.K., Rodriguez Lopez, C.M., Chalmers, I.W., Munshi, S.E., Truscott, M., Heald, J., Wilkinson, M.J., and Hoffmann, K.F. (2011). Cytosine methylation regulates oviposition in the pathogenic blood fluke *Schistosoma mansoni*. *Nature communications* 2, 424.
- Gill, R.M., Gabor, T.V., Couzens, A.L., and Scheid, M.P. (2013). The MYC-associated protein CDCA7 is phosphorylated by AKT to regulate MYC-dependent apoptosis and transformation. *Mol Cell Biol* 33, 498-513.
- Greenberg, M.V.C., and Bourc'his, D. (2019). The diverse roles of DNA methylation in mammalian development and disease. *Nat Rev Mol Cell Biol* 20, 590-607.
- Grogan, D.W. (2003). Cytosine methylation by the Sual restriction-modification system: implications for genetic fidelity in a hyperthermophilic archaeon. *J Bacteriol* 185, 4657-4661.
- Han, M., Li, J., Cao, Y., Huang, Y., Li, W., Zhu, H., Zhao, Q., Han, J.J., Wu, Q., Li, J., *et al.* (2020). A role for LSH in facilitating DNA methylation by DNMT1 through enhancing UHRF1 chromatin association. *Nucleic Acids Res* 48, 12116-12134.
- Hansen, R.S., Wijmenga, C., Luo, P., Stanek, A.M., Canfield, T.K., Weemaes, C.M., and Gartler, S.M. (1999). The DNMT3B DNA methyltransferase gene is mutated in the ICF immunodeficiency syndrome. *Proc Natl Acad Sci U S A* 96, 14412-14417.
- Hardikar, S., Ying, Z., Zeng, Y., Zhao, H., Liu, B., Veland, N., McBride, K., Cheng, X., and Chen, T. (2020). The ZBTB24-CDCA7 axis regulates HELLS enrichment at centromeric satellite repeats to facilitate DNA methylation. *Protein Cell* 11, 214-218.
- Hayashi, M., Sugahara, K., Yamamura, A., and Iida, Y. (2021). Evaluation of the Properties of the DNA Methyltransferase from *Aeropyrum pernix* K1. *Microbiol Spectr* 9, e0018621.
- Hemmi, H., Takeuchi, O., Kawai, T., Kaisho, T., Sato, S., Sanjo, H., Matsumoto, M., Hoshino, K., Wagner, H., Takeda, K., *et al.* (2000). A Toll-like receptor recognizes bacterial DNA. *Nature* 408, 740-745.
- Higgins, D.G., and Sharp, P.M. (1988). CLUSTAL: a package for performing multiple sequence alignment on a microcomputer. *Gene* 73, 237-244.
- Hoang, D.T., Chernomor, O., von Haeseler, A., Minh, B.Q., and Vinh, L.S. (2018). UFBoot2: Improving the Ultrafast Bootstrap Approximation. *Mol Biol Evol* 35, 518-522.
- Honda, S., Lewis, Z.A., Huarte, M., Cho, L.Y., David, L.L., Shi, Y., and Selker, E.U. (2010). The DMM complex prevents spreading of DNA methylation from transposons to nearby genes in *Neurospora crassa*. *Genes Dev* 24, 443-454.
- Huang, A., Ho, C.S., Ponzielli, R., Barsyte-Lovejoy, D., Bouffet, E., Picard, D., Hawkins, C.E., and Penn, L.Z. (2005). Identification of a novel c-Myc protein interactor, JPO2, with transforming activity in medulloblastoma cells. *Cancer Res* 65, 5607-5619.

- Huang, J., Fan, T., Yan, Q., Zhu, H., Fox, S., Issaq, H.J., Best, L., Gangi, L., Munroe, D., and Muegge, K. (2004). Lsh, an epigenetic guardian of repetitive elements. *Nucleic Acids Res* 32, 5019-5028.
- Huff, J.T., and Zilberman, D. (2014). Dnmt1-independent CG methylation contributes to nucleosome positioning in diverse eukaryotes. *Cell* 156, 1286-1297.
- Imai, Y., Biot, M., Clement, J.A., Teragaki, M., Urbach, S., Robert, T., Baudat, F., Grey, C., and de Massy, B. (2020). PRDM9 activity depends on HELLS and promotes local 5-hydroxymethylcytosine enrichment. *Elife* 9.
- Ishikawa, K., Watanabe, M., Kuroita, T., Uchiyama, I., Bujnicki, J.M., Kawakami, B., Tanokura, M., and Kobayashi, I. (2005). Discovery of a novel restriction endonuclease by genome comparison and application of a wheat-germ-based cell-free translation assay: PabI (5'-GTA/C) from the hyperthermophilic archaeon *Pyrococcus abyssi*. *Nucleic Acids Res* 33, e112.
- Ivasyk, I., Olivos-Cisneros, L., Valdes-Rodriguez, S., Droual, M., Jang, H., Schmitz, R.J., and Kronauer, D.J.C. (2023). DNMT1 mutant ants develop normally but have disrupted oogenesis. *Nature communications* 14, 2201.
- Iyer, L.M., Abhiman, S., and Aravind, L. (2011). Natural history of eukaryotic DNA methylation systems. *Prog Mol Biol Transl Sci* 101, 25-104.
- Jamieson, K., Rountree, M.R., Lewis, Z.A., Stajich, J.E., and Selker, E.U. (2013). Regional control of histone H3 lysine 27 methylation in *Neurospora*. *Proc Natl Acad Sci U S A* 110, 6027-6032.
- Jenness, C., Giunta, S., Muller, M.M., Kimura, H., Muir, T.W., and Funabiki, H. (2018). HELLS and CDCA7 comprise a bipartite nucleosome remodeling complex defective in ICF syndrome. *Proc Natl Acad Sci U S A* 115, E876-E885.
- Jiang, Y.L., Rigolet, M., Bourc'his, D., Nigon, F., Bokesoy, I., Fryns, J.P., Hulten, M., Jonveaux, P., Maraschio, P., Megarbane, A., *et al.* (2005). DNMT3B mutations and DNA methylation defect define two types of ICF syndrome. *Hum Mutat* 25, 56-63.
- Kato, M., Miura, A., Bender, J., Jacobsen, S.E., and Kakutani, T. (2003). Role of CG and non-CG methylation in immobilization of transposons in *Arabidopsis*. *Current biology* : CB 13, 421-426.
- Kondilis-Mangum, H.D., and Wade, P.A. (2013). Epigenetics and the adaptive immune response. *Mol Aspects Med* 34, 813-825.
- Kumar, S., Suleski, M., Craig, J.M., Kaspruwicz, A.E., Sanderford, M., Li, M., Stecher, G., and Hedges, S.B. (2022). TimeTree 5: An Expanded Resource for Species Divergence Times. *Mol Biol Evol* 39.
- Kyger, R., Luzuriaga-Neira, A., Layman, T., Milkewitz Sandberg, T.O., Singh, D., Huchon, D., Peri, S., Atkinson, S.D., Bartholomew, J.L., Yi, S.V., *et al.* (2021). Myxosporea (Myxozoa, Cnidaria) Lack DNA Cytosine Methylation. *Mol Biol Evol* 38, 393-404.
- Lewis, S.H., Ross, L., Bain, S.A., Pahita, E., Smith, S.A., Cordaux, R., Miska, E.A., Lenhard, B., Jiggins, F.M., and Sarkies, P. (2020). -----Widespread conservation and lineage-specific diversification of genome-wide DNA methylation patterns across arthropods. *PLoS Genet* 16, e1008864.
- Li, B., Du, Z., Tian, L., Zhang, L., Huang, Z., Wei, S., Song, F., Cai, W., Yu, Y., Yang, H., *et al.* (2021). Chromosome-level genome assembly of the aphid parasitoid *Aphidius gifuensis* using Oxford Nanopore sequencing and Hi-C technology. *Mol Ecol Resour* 21, 941-954.
- Li, B., Hou, L., Zhu, D., Xu, X., An, S., and Wang, X. (2018). Identification and caste-dependent expression patterns of DNA methylation associated genes in *Bombus terrestris*. *Sci Rep* 8, 2332.

- Li, D., Liu, J., Liu, W., Li, G., Yang, Z., Qin, P., and Xu, L. (2017). The ISWI remodeler in plants: protein complexes, biochemical functions, and developmental roles. *Chromosoma* 126, 365-373.
- Libbrecht, R., Oxley, P.R., Keller, L., and Kronauer, D.J. (2016). Robust DNA Methylation in the Clonal Raider Ant Brain. *Current biology : CB* 26, 391-395.
- Litwin, I., Bakowski, T., Maciaszczyk-Dziubinska, E., and Wysocki, R. (2017). The LSH/HELLS homolog Irc5 contributes to cohesin association with chromatin in yeast. *Nucleic Acids Res* 45, 6404-6416.
- Long, H.K., Blackledge, N.P., and Klose, R.J. (2013). ZF-CxxC domain-containing proteins, CpG islands and the chromatin connection. *Biochem Soc Trans* 41, 727-740.
- Lowe, R., Barton, C., Jenkins, C.A., Ernst, C., Forman, O., Fernandez-Twinn, D.S., Bock, C., Rossiter, S.J., Faulkes, C.G., Ozanne, S.E., *et al.* (2018). Ageing-associated DNA methylation dynamics are a molecular readout of lifespan variation among mammalian species. *Genome Biol* 19, 22.
- Lu, S., Wang, J., Chitsaz, F., Derbyshire, M.K., Geer, R.C., Gonzales, N.R., Gwadz, M., Hurwitz, D.I., Marchler, G.H., Song, J.S., *et al.* (2020). CDD/SPARCLE: the conserved domain database in 2020. *Nucleic Acids Res* 48, D265-D268.
- Lyko, F. (2018). The DNA methyltransferase family: a versatile toolkit for epigenetic regulation. *Nat Rev Genet* 19, 81-92.
- Lyons, D.B., and Zilberman, D. (2017). DDM1 and Lsh remodelers allow methylation of DNA wrapped in nucleosomes. *Elife* 6.
- Maertens, G.N., Cherepanov, P., and Engelman, A. (2006). Transcriptional co-activator p75 binds and tethers the Myc-interacting protein JPO2 to chromatin. *J Cell Sci* 119, 2563-2571.
- Margueron, R., and Reinberg, D. (2011). The Polycomb complex PRC2 and its mark in life. *Nature* 469, 343-349.
- Militello, K.T., Wang, P., Jayakar, S.K., Pietrasik, R.L., Dupont, C.D., Dodd, K., King, A.M., and Valenti, P.R. (2008). African trypanosomes contain 5-methylcytosine in nuclear DNA. *Eukaryot Cell* 7, 2012-2016.
- Ming, X., Zhang, Z., Zou, Z., Lv, C., Dong, Q., He, Q., Yi, Y., Li, Y., Wang, H., and Zhu, B. (2020). Kinetics and mechanisms of mitotic inheritance of DNA methylation and their roles in aging-associated methylome deterioration. *Cell Res* 30, 980-996.
- Minh, B.Q., Schmidt, H.A., Chernomor, O., Schrempf, D., Woodhams, M.D., von Haeseler, A., and Lanfear, R. (2020). IQ-TREE 2: New Models and Efficient Methods for Phylogenetic Inference in the Genomic Era. *Mol Biol Evol* 37, 1530-1534.
- Miro-Pina, C., Charmant, O., Kawaguchi, T., Holoch, D., Michaud, A., Cohen, I., Humbert, A., Jaszczyszyn, Y., Chevreux, G., Del Maestro, L., *et al.* (2022). Paramecium Polycomb repressive complex 2 physically interacts with the small RNA-binding PIWI protein to repress transposable elements. *Developmental cell* 57, 1037-1052 e1038.
- Mistry, J., Chuguransky, S., Williams, L., Qureshi, M., Salazar, G.A., Sonnhammer, E.L.L., Tosatto, S.C.E., Paladin, L., Raj, S., Richardson, L.J., *et al.* (2021). Pfam: The protein families database in 2021. *Nucleic Acids Res* 49, D412-D419.
- Miura, A., Yonebayashi, S., Watanabe, K., Toyama, T., Shimada, H., and Kakutani, T. (2001). Mobilization of transposons by a mutation abolishing full DNA methylation in *Arabidopsis*. *Nature* 411, 212-214.
- Mondo, S.J., Dannebaum, R.O., Kuo, R.C., Louie, K.B., Bewick, A.J., LaButti, K., Haridas, S., Kuo, A., Salamov, A., Ahrendt, S.R., *et al.* (2017). Widespread adenine N6-methylation of active genes in fungi. *Nat Genet* 49, 964-968.
- Moon, E.K., Hong, Y., Lee, H.A., Quan, F.S., and Kong, H.H. (2017). DNA Methylation of Gene Expression in *Acanthamoeba castellanii* Encystation. *Korean J Parasitol* 55, 115-120.

- Mulholland, C.B., Nishiyama, A., Ryan, J., Nakamura, R., Yigit, M., Gluck, I.M., Trummer, C., Qin, W., Bartoschek, M.D., Traube, F.R., *et al.* (2020). Recent evolution of a TET-controlled and DPPA3/STELLA-driven pathway of passive DNA demethylation in mammals. *Nature communications* **11**, 5972.
- Myant, K., Termanis, A., Sundaram, A.Y., Boe, T., Li, C., Merusi, C., Burrage, J., de Las Heras, J.I., and Stancheva, I. (2011). LSH and G9a/GLP complex are required for developmentally programmed DNA methylation. *Genome Res* **21**, 83-94.
- Nai, Y.S., Huang, Y.C., Yen, M.R., and Chen, P.Y. (2020). Diversity of Fungal DNA Methyltransferases and Their Association With DNA Methylation Patterns. *Front Microbiol* **11**, 616922.
- Neri, F., Rapelli, S., Krepelova, A., Incarnato, D., Parlato, C., Basile, G., Maldotti, M., Anselmi, F., and Oliviero, S. (2017). Intragenic DNA methylation prevents spurious transcription initiation. *Nature* **543**, 72-77.
- Ni, K., and Muegge, K. (2021). LSH catalyzes ATP-driven exchange of histone variants macroH2A1 and macroH2A2. *Nucleic Acids Res* **49**, 8024-8036.
- Ni, K., Ren, J., Xu, X., He, Y., Finney, R., Braun, S.M.G., Hathaway, N.A., Crabtree, G.R., and Muegge, K. (2020). LSH mediates gene repression through macroH2A deposition. *Nature communications* **11**, 5647.
- Nishiyama, A., Mulholland, C.B., Bultmann, S., Kori, S., Endo, A., Saeki, Y., Qin, W., Trummer, C., Chiba, Y., Yokoyama, H., *et al.* (2020). Two distinct modes of DNMT1 recruitment ensure stable maintenance DNA methylation. *Nature communications* **11**, 1222.
- Nishiyama, A., and Nakanishi, M. (2021). Navigating the DNA methylation landscape of cancer. *Trends Genet* **37**, 1012-1027.
- Noordhoek, J.W., Koning, J.T., Marien, J., Kamstra, J.H., Amorim, M.J.B., van Gestel, C.A.M., van Straalen, N.M., and Roelofs, D. (2018). Exploring DNA methylation patterns in copper exposed *Folsomia candida* and *Enchytraeus crypticus*. *Pedobiologia* **66**, 52-57.
- Okano, M., Bell, D.W., Haber, D.A., and Li, E. (1999). DNA methyltransferases Dnmt3a and Dnmt3b are essential for de novo methylation and mammalian development. *Cell* **99**, 247-257.
- Onishi, R., Yamanaka, S., and Siomi, M.C. (2021). piRNA- and siRNA-mediated transcriptional repression in *Drosophila*, mice, and yeast: new insights and biodiversity. *EMBO Rep* **22**, e53062.
- Osakabe, A., Jamge, B., Axelsson, E., Montgomery, S.A., Akimcheva, S., Kuehn, A.L., Pisupati, R., Lorkovic, Z.J., Yelagandula, R., Kakutani, T., *et al.* (2021). The chromatin remodeler DDM1 prevents transposon mobility through deposition of histone variant H2A.W. *Nat Cell Biol* **23**, 391-400.
- Ou, X.M., Chen, K., and Shih, J.C. (2006). Glucocorticoid and androgen activation of monoamine oxidase A is regulated differently by R1 and Sp1. *The Journal of biological chemistry* **281**, 21512-21525.
- Paysan-Lafosse, T., Blum, M., Chuguransky, S., Grego, T., Pinto, B.L., Salazar, G.A., Bileschi, M.L., Bork, P., Bridge, A., Colwell, L., *et al.* (2023). InterPro in 2022. *Nucleic Acids Res* **51**, D418-D427.
- Peters, R.S., Krogmann, L., Mayer, C., Donath, A., Gunkel, S., Meusemann, K., Kozlov, A., Podsiadlowski, L., Petersen, M., Lanfear, R., *et al.* (2017). Evolutionary History of the Hymenoptera. *Current biology : CB* **27**, 1013-1018.
- Pinto, B.J., Weis, J.J., Gamble, T., Ode, P.J., Paul, R., and Zaspel, J.M. (2021). A Chromosome-Level Genome Assembly of the Parasitoid Wasp, *Cotesia glomerata* (Hymenoptera: Braconidae). *J Hered* **112**, 558-564.

- Ponger, L., and Li, W.H. (2005). Evolutionary diversification of DNA methyltransferases in eukaryotic genomes. *Mol Biol Evol* 22, 1119-1128.
- Prangishvili, D.A., Vashakidze, R.P., Chelidze, M.G., and Gabriadze, I. (1985). A restriction endonuclease Sual from the thermoacidophilic archaebacterium *Sulfolobus acidocaldarius*. *FEBS Lett* 192, 57-60.
- Pratt, R.J., Lee, D.W., and Aramayo, R. (2004). DNA methylation affects meiotic trans-sensing, not meiotic silencing, in *Neurospora*. *Genetics* 168, 1925-1935.
- Ren, J., Briones, V., Barbour, S., Yu, W., Han, Y., Terashima, M., and Muegge, K. (2015). The ATP binding site of the chromatin remodeling homolog Lsh is required for nucleosome density and de novo DNA methylation at repeat sequences. *Nucleic Acids Res* 43, 1444-1455.
- Robertson, K.D. (2005). DNA methylation and human disease. *Nat Rev Genet* 6, 597-610.
- Saze, H., Shiraishi, A., Miura, A., and Kakutani, T. (2008). Control of genic DNA methylation by a *jmjC* domain-containing protein in *Arabidopsis thaliana*. *Science* 319, 462-465.
- Schofield, M.J., and Hsieh, P. (2003). DNA mismatch repair: molecular mechanisms and biological function. *Annu Rev Microbiol* 57, 579-608.
- Schulz, N.K.E., Wagner, C.I., Ebeling, J., Raddatz, G., Diddens-de Buhr, M.F., Lyko, F., and Kurtz, J. (2018). Dnmt1 has an essential function despite the absence of CpG DNA methylation in the red flour beetle *Tribolium castaneum*. *Sci Rep* 8, 16462.
- Sharaf, A., Vijayanathan, M., Obornik, M., and Mozgova, I. (2022). Phylogenetic profiling resolves early emergence of PRC2 and illuminates its functional core. *Life Sci Alliance* 5.
- Singh, A., Vancura, A., Woycicki, R.K., Hogan, D.J., Hendrick, A.G., and Nowacki, M. (2018). Determination of the presence of 5-methylcytosine in *Paramecium tetraurelia*. *PloS one* 13, e0206667.
- Spruce, C., Dlamini, S., Ananda, G., Bronkema, N., Tian, H., Paigen, K., Carter, G.W., and Baker, C.L. (2020). HELLS and PRDM9 form a pioneer complex to open chromatin at meiotic recombination hot spots. *Genes Dev* 34, 398-412.
- Takada, Y., Yaman-Deveci, R., Shirakawa, T., Sharif, J., Tomizawa, S.I., Miura, F., Ito, T., Ono, M., Nakajima, K., Koseki, Y., *et al.* (2021). Maintenance DNA methylation in pre-meiotic germ cells regulates meiotic prophase by facilitating homologous chromosome pairing. *Development* 148.
- Tan, L.M., Liu, R., Gu, B.W., Zhang, C.J., Luo, J., Guo, J., Wang, Y., Chen, L., Du, X., Li, S., *et al.* (2020). Dual Recognition of H3K4me3 and DNA by the ISWI Component ARID5 Regulates the Floral Transition in *Arabidopsis*. *Plant Cell* 32, 2178-2195.
- Tesina, P., Cermakova, K., Horejsi, M., Prochazkova, K., Fabry, M., Sharma, S., Christ, F., Demeulemeester, J., Debyser, Z., Rijck, J., *et al.* (2015). Multiple cellular proteins interact with LEDGF/p75 through a conserved unstructured consensus motif. *Nature communications* 6, 7968.
- Thijssen, P.E., Ito, Y., Grillo, G., Wang, J., Velasco, G., Nitta, H., Unoki, M., Yoshihara, M., Suyama, M., Sun, Y., *et al.* (2015). Mutations in CDCA7 and HELLS cause immunodeficiency-centromeric instability-facial anomalies syndrome. *Nature communications* 6, 7870.
- Thompson, J.D., Higgins, D.G., and Gibson, T.J. (1994). CLUSTAL W: improving the sensitivity of progressive multiple sequence alignment through sequence weighting, position-specific gap penalties and weight matrix choice. *Nucleic Acids Res* 22, 4673-4680.
- Tirot, L., Jullien, P.E., and Ingouff, M. (2021). Evolution of CG Methylation Maintenance Machinery in Plants. *Epigenomes* 5.

- Unoki, M. (2021). Chromatin remodeling in replication-uncoupled maintenance DNA methylation and chromosome stability: Insights from ICF syndrome studies. *Genes Cells* 26, 349-359.
- Unoki, M., Funabiki, H., Velasco, G., Francastel, C., and Sasaki, H. (2019). CDCA7 and HELLS mutations undermine nonhomologous end joining in centromeric instability syndrome. *J Clin Invest* 129, 78-92.
- Unoki, M., Sharif, J., Saito, Y., Velasco, G., Francastel, C., Koseki, H., and Sasaki, H. (2020). CDCA7 and HELLS suppress DNA:RNA hybrid-associated DNA damage at pericentromeric repeats. *Sci Rep* 10, 17865.
- Vasu, K., and Nagaraja, V. (2013). Diverse functions of restriction-modification systems in addition to cellular defense. *Microbiol Mol Biol Rev* 77, 53-72.
- Velasco, G., Grillo, G., Touleimat, N., Ferry, L., Ivkovic, I., Ribierre, F., Deleuze, J.F., Chantalat, S., Picard, C., and Francastel, C. (2018). Comparative methylome analysis of ICF patients identifies heterochromatin loci that require ZBTB24, CDCA7 and HELLS for their methylated state. *Hum Mol Genet*.
- Vongs, A., Kakutani, T., Martienssen, R.A., and Richards, E.J. (1993). Arabidopsis thaliana DNA methylation mutants. *Science* 260, 1926-1928.
- Vukic, M., and Daxinger, L. (2019). DNA methylation in disease: Immunodeficiency, Centromeric instability, Facial anomalies syndrome. *Essays Biochem* 63, 773-783.
- Walker, M.G. (2001). Drug target discovery by gene expression analysis: cell cycle genes. *Curr Cancer Drug Targets* 1, 73-83.
- Wang, T., Ma, J., Hogan, A.N., Fong, S., Licon, K., Tsui, B., Kreisberg, J.F., Adams, P.D., Carvunis, A.R., Bannasch, D.L., *et al.* (2020). Quantitative Translation of Dog-to-Human Aging by Conserved Remodeling of the DNA Methylome. *Cell Syst* 11, 176-185 e176.
- Wang, X., Wheeler, D., Avery, A., Rago, A., Choi, J.H., Colbourne, J.K., Clark, A.G., and Werren, J.H. (2013). Function and evolution of DNA methylation in *Nasonia vitripennis*. *PLoS Genet* 9, e1003872.
- Ward, N., and Moreno-Hagelsieb, G. (2014). Quickly finding orthologs as reciprocal best hits with BLAT, LAST, and UBLAST: how much do we miss? *PloS one* 9, e101850.
- Washington, J.T., Cavender, K.R., Amukamara, A.U., McKinney, E.C., Schmitz, R.J., and Moore, P.J. (2021). The essential role of Dnmt1 in gametogenesis in the large milkweed bug *Oncopeltus fasciatus*. *Elife* 10.
- Waterhouse, A.M., Procter, J.B., Martin, D.M., Clamp, M., and Barton, G.J. (2009). Jalview Version 2--a multiple sequence alignment editor and analysis workbench. *Bioinformatics* 25, 1189-1191.
- Wu, H., Thijssen, P.E., de Klerk, E., Vonk, K.K., Wang, J., den Hamer, B., Aytekin, C., van der Maarel, S.M., and Daxinger, L. (2016). Converging disease genes in ICF syndrome: ZBTB24 controls expression of CDCA7 in mammals. *Hum Mol Genet* 25, 4041-4051.
- Xu, X., Ni, K., He, Y., Ren, J., Sun, C., Liu, Y., Aladjem, M.I., Burkett, S., Finney, R., Ding, X., *et al.* (2021). The epigenetic regulator LSH maintains fork protection and genomic stability via MacroH2A deposition and RAD51 filament formation. *Nature communications* 12, 3520.
- Yaari, R., Katz, A., Domb, K., Harris, K.D., Zemach, A., and Ohad, N. (2019). RdDM-independent de novo and heterochromatin DNA methylation by plant CMT and DNMT3 orthologs. *Nature communications* 10, 1613.
- Yamada, K., Frouws, T.D., Angst, B., Fitzgerald, D.J., DeLuca, C., Schimmele, K., Sargent, D.F., and Richmond, T.J. (2011). Structure and mechanism of the chromatin remodelling factor ISW1a. *Nature* 472, 448-453.

- Yu, W., McIntosh, C., Lister, R., Zhu, I., Han, Y., Ren, J., Landsman, D., Lee, E., Briones, V., Terashima, M., *et al.* (2014). Genome-wide DNA methylation patterns in LSH mutant reveals de-repression of repeat elements and redundant epigenetic silencing pathways. *Genome Res* 24, 1613-1623.
- Zemach, A., Kim, M.Y., Hsieh, P.H., Coleman-Derr, D., Eshed-Williams, L., Thao, K., Harmer, S.L., and Zilberman, D. (2013). The Arabidopsis nucleosome remodeler DDM1 allows DNA methyltransferases to access H1-containing heterochromatin. *Cell* 153, 193-205.
- Zemach, A., McDaniel, I.E., Silva, P., and Zilberman, D. (2010). Genome-wide evolutionary analysis of eukaryotic DNA methylation. *Science* 328, 916-919.
- Zeng, W., Baumann, C., Schmidtmann, A., Honaramooz, A., Tang, L., Bondareva, A., Does, C., Fan, T., Xi, S., Geiman, T., *et al.* (2011). Lymphoid-specific helicase (HELLS) is essential for meiotic progression in mouse spermatocytes. *Biol Reprod* 84, 1235-1241.
- Zhang, C., Tian, Y., Song, S., Zhang, L., Dang, Y., and He, Q. (2022). H3K56 deacetylation and H2A.Z deposition are required for aberrant heterochromatin spreading. *Nucleic Acids Res* 50, 3852-3866.

## Figure legends

### Figure 1. CDCA7 is absent from model organisms with undetectable genomic 5mC

Filled squares and open squares indicate presence and absence of an orthologous protein(s), respectively. CDCA7 homologs are absent from model organisms where DNMT1, DNMT3 and 5mC on genomic are absent.

### Figure 1–source data 1. Lists of proteins and species used in this study

Tab1, Full list. The list contains species names, their taxonomies, Genbank accession numbers of proteins, PMID of references supporting the 5mC status, and genome sequence assembly statistics. ND; not detected. DNMT5 proteins shown in red lack the Snf2-like ATPase domain. UHRF1 proteins shown in red lack the Ring-finger E3 ubiquitin-ligase domain. CDCA7 proteins shown in red indicate ambiguous annotation as described in the main text. CDCA7 orthologs that contain additional conserved domains found by NCBI CD-search were shown in light blue.

Tab2, Full list 2. The list is used to make presence (1) or absence (0) list.

Tab3 Ecdysozoa CoPAP. List of presence/absence annotations for Ecdysozoa species used for CO-PAP analysis.

Tab4 Full CoPAP1. List of presence/absence data annotations for the panel of all 180 species used for CO-PAP analysis. Fungal CDCA7F proteins with class II zf-4CXXC\_R1 are included in CDCA7.

Tab5 Full CoPAP2. List of presence/absence data annotations for the panel of all 180 species used for CO-PAP analysis. Fungal CDCA7F proteins are included in class II zf-4CXXC\_R1.

Tab6 Full clustering. Table used for clustering analysis

Tab7 Metazoan invertebrates. Table used for clustering analysis for metazoan invertebrates.

Tab7 No 5mC list. List of species where absence of genomic 5mC has been experimentally shown.

### Figure 2. CDCA7 paralogs in vertebrates

A. Schematics of vertebrate CDCA7 primary sequence composition, based on NP\_114148. Yellow lines and light blue lines indicate positions of evolutionary conserved cysteine residues and residues that are mutated in ICF patients, respectively. B. Sequence alignment of the zf-4CXXC\_R1 domain of vertebrate CDCA7-family proteins. White arrowheads; amino residues unique in fish CDCA7L. Black arrowheads; residues that distinguish CDCA7L and CDCA7e from CDCA7. C. Sequence alignment of LEDGF-binding motifs. D. Sequence alignment of the conserved leucine-zipper.

### Figure 2–figure supplement 1. Evolutionary conservation of CDCA7-family proteins and other zf-4CXXC\_R1-containing proteins

Amino acid sequences of zf-4CXXC\_R1 domain from indicated species were aligned with CLUSTALW. A phylogenetic tree of this alignment is shown. Genbank accession numbers of analyzed sequences are indicated. The tree topology was largely consistent

with a tree generated by IQ-TREE based on an alignment using Muscle (Figure 2—source data 1 and Figure 2—source data 2).

### **Figure 2—source data 1. Multiple sequence alignment of zf-4CXXC\_R1 domains**

The zf-4CXXC\_R1 domains were aligned by MUSCLE v5.

### **Figure 2—source data 2. An IQ-TREE result of the consensus phylogenetic tree generation of zf-4CXXC\_R1 containing proteins**

Figure 2—source data 2 was used for the analysis by IQ-TREE.

### **Figure 3. CDCA7 homologs and other zf-4CXXC\_R1-containing proteins in**

#### ***Arabidopsis***

Top; alignments of the zf-4CXXC\_R1 domain found in *Arabidopsis thaliana*. Bottom; domain structure of the three classes of zf-4CXXC\_R1-containing proteins in *Arabidopsis*.

### **Figure 3—figure supplement 1. Sequence alignment and classification of zf-4CXXC\_R1 domains across eukaryotes**

CDCA7 orthologs are characterized by the class I zf-4CXXC\_R1 domain, where eleven cysteine residues and three residues mutated in ICF patients are conserved. Class II zf-4CXXC\_R1 domain is similar to class I except that ICF-associated glycine (G294 in human) is substituted. Class III is zf-4CXXC\_R domain with more substitutions at the ICF-associated residues (R274 and/or G294). Proteins that also contain JmjC domain (sequence not shown here) are indicated. Note that codon frame after the stop codon (an asterisk in a magenta box) of *Naegleria* XP\_002678720 encodes a peptide sequence that aligns well with human CDCA7, indicating that the apparent premature termination of XP\_002678720 is likely caused by a sequencing or annotation error.

### **Figure 4. Evolutionary conservation of CDCA7F, HELLS and DNMTs in fungi**

A. Sequence alignment of fungi-specific CDCA7F with class II zf-4CXXC\_R1 sequences. B. Domain architectures of zf-4CXXC\_R1-containing proteins in fungi. The class II zf-4CXXC\_R1 domain is indicated with purple circles. Squares with dotted lines indicate preliminary genome assemblies. Opaque boxes of UHRF1 indicate homologs that harbor the SRA domain but not the RING-finger domain.

### **Figure 5. Evolutionary conservation of CDCA7, HELLS and DNMTs**

The phylogenetic tree was generated based on Timetree 5 (Kumar et al., 2022). Filled squares and open squares indicate presence and absence of an orthologous protein(s), respectively. Squares with dotted lines imply preliminary-level genome assemblies. Squares with a diagonal line; *Paramecium* EED was functionally identified (Miro-Pina et al., 2022), but not by the sequence-based search in this study; homologs of EZH1/2 and EED were identified in *Symbiodinium* sp. KB8 but not in *Symbiodinium microadriaticum* (Figure 1—source data 1). An opaque box of DNMT5 in *Symbiodinium* indicates a homolog that does not contain the ATPase domain, which is commonly found in DNMT5 family proteins. Opaque boxes of UHRF1 indicate homologs that harbor the SRA domain but not the RING-finger domain. Full set of analysis on the panel of 180 eukaryote

species is shown in Figure 5—figure supplement 1 and Figure 1—source data 1. Genbank accession numbers of each protein and PMID numbers of published papers that report presence or absence of 5mC are reported in Figure 1—source data 1.

### **Figure 5—figure supplement 1. Evolutionary conservation of CDCA7, HELLS and DNMTs**

Presence and absence of each annotated proteins in the panel of 180 eukaryote species is marked as filled and blank boxes. The phylogenetic tree was generated by iTOL, based on NCBI taxonomy by phyloT. Bottom right; summary of combinatory presence or absence of CDCA7 (including fungal CDCA7F containing class II zf-4CXXC\_R1), HELLS, and maintenance DNA methyltransferases DNMT1/Dim-2/DNMT5. Supporting information including Genbank accession numbers are listed in Figure 1—source data 1.

### **Figure 5—figure supplement 2. Phylogenetic tree of HELLS and other SNF2 family proteins**

Amino acid sequences of full-length HELLS proteins from the panel of 180 eukaryote species listed in Figure 1—source data 1 were aligned with full length sequences of other SNF2 family proteins with CLUSTALW. A phylogenetic tree of this alignment is shown. Genbank accession numbers of analyzed sequences are indicated.

### **Figure 5—figure supplement 3. Phylogenetic tree of the SNF2-domain**

Amino acid sequences of SNF2-domain without variable insertions from representative HELLS and DDM1-like proteins from Figure S3 were aligned with the corresponding domain of other SNF2 family proteins with CLUSTALW. A phylogenetic tree of this alignment is shown. Genbank accession numbers of analyzed sequences are indicated. The tree topology was largely consistent with a tree generated by IQ-TREE based on an alignment using Muscle (Figure 5—source data 1 and Figure 5—source data 2).

### **Figure 5—source data 1. Multiple sequence alignment of the SNF2 ATPase domains of HELLS homologs and other SNF2-family proteins**

The SNF2 ATPase domains of HELLS and other SNF2-family proteins after removing the variable linker regions were aligned by MUSCLE v5.

### **Figure 5—source data 2. An IQ-TREE result of the consensus phylogenetic tree generation of HELLS homologs and other SNF2-family proteins**

Figure 5—source data 1 was used for the analysis by IQ-TREE.

### **Figure 5—figure supplement 4. Phylogenetic tree of DNMT proteins**

DNA methyltransferase domain of DNMT proteins across eukaryotes (Figure 1—source data 1, excluding majority of those from Metazoa), the *Escherichia coli* DNA methylases DCM and Dam, and Homo sapiens PCNA as an outlier sequence, were aligned with Muscle, and a consensus phylogenetic tree was constructed from 1000 bootstrap trees using IQ-TREE. Branch lengths are optimized by maximum likelihood on original alignment. Numbers in parentheses are bootstrap supports (%).

### **Figure 5—source data 3. Multiple sequence alignment of DNA methyltransferase domains for Figure 5—figure supplement 4.**

DNMT domains from various DNMTs were aligned by MUSCLE v5.

### **Figure 5—source data 4. An IQ-TREE result of the consensus phylogenetic tree generation of DNMTs for Figure 5—figure supplement 4**

Figure 5—source data 3 was used for the analysis by IQ-TREE.

### **Figure 6. Coevolution of CDCA7, HELLS, UHRF1 and DNMT1 in Ecdysozoa**

A. Presence (filled squares) /absence (open squares) patterns of indicated proteins and genomic 5mC in selected Ecdysozoa species. Squares with dotted lines imply preliminary-level genome assemblies. Domain architectures of CDCA7 proteins with a zf-4CXXC\_R1 domain are also shown. B. CoPAP analysis of 50 Ecdysozoa species. Presence/absence patterns of indicated proteins during evolution were analyzed. List of species are shown in Figure 1—source data 1. Phylogenetic tree was generated by amino acid sequences of all proteins shown in Figure 1—source data 1. The number indicates the *p*-values.

### **Figure 6—figure supplement 1. CoPAP analysis of CDCA7, HELLS and DNMTs in eukaryotes**

CoPAP analysis of 180 eukaryote species. Presence and absence patterns of indicated proteins during evolution were analyzed. List of species are shown in Figure 1—source data 1 (A, Tab4. Full CoPAP1; B, Tab5. Full CoPAP2). Fungal CDCA7F proteins are included in CDCA7 and zf-4CXXC\_R1 class II in A and B, respectively. Phylogenetic tree was generated by amino acid sequences of all proteins shown in Figure 1—source data 1. The number indicates the *p*-values.

### **Figure 7. Synteny of Hymenoptera genomes adjacent to CDCA7 genes**

Genome compositions around CDCA7 genes in Hymenoptera insects are shown. For genome with annotated chromosomes, chromosome numbers (Chr) or linkage group numbers (LG) are indicated at each gene cluster. Gene clusters without chromosome annotation indicate that they are within a same scaffold or contig. Gene locations within each contig are listed in Figure 7—source data 1. Dash lines indicate the long linkages not proportionally scaled in the figure. Due to their extraordinarily long sizes, DE-cadherin genes (L) are not scaled proportionally. Presence and absence of 5mC, CDCA7, HELLS, DNMT1, DNMT3, and UHRF1 in each genome is indicated by filled and open boxes, respectively. Absence of 5mC in *Aphidius gifuensis* (marked with an asterisk) is deduced from the study in *Aphidius ervi* (Bewick et al., 2017b), which has an identical presence/absence pattern of the listed genes (Figure 7—source data 2). The phylogenetic tree is drawn based on published analysis (Li et al., 2021; Peters et al., 2017) and TimeTree.

### **Figure 7—source data 1. Summary of Hymenoptera genome location for Figure 7**

**Figure 7—source data 2. Lists of proteins in Hymenoptera species supporting Figure 7**

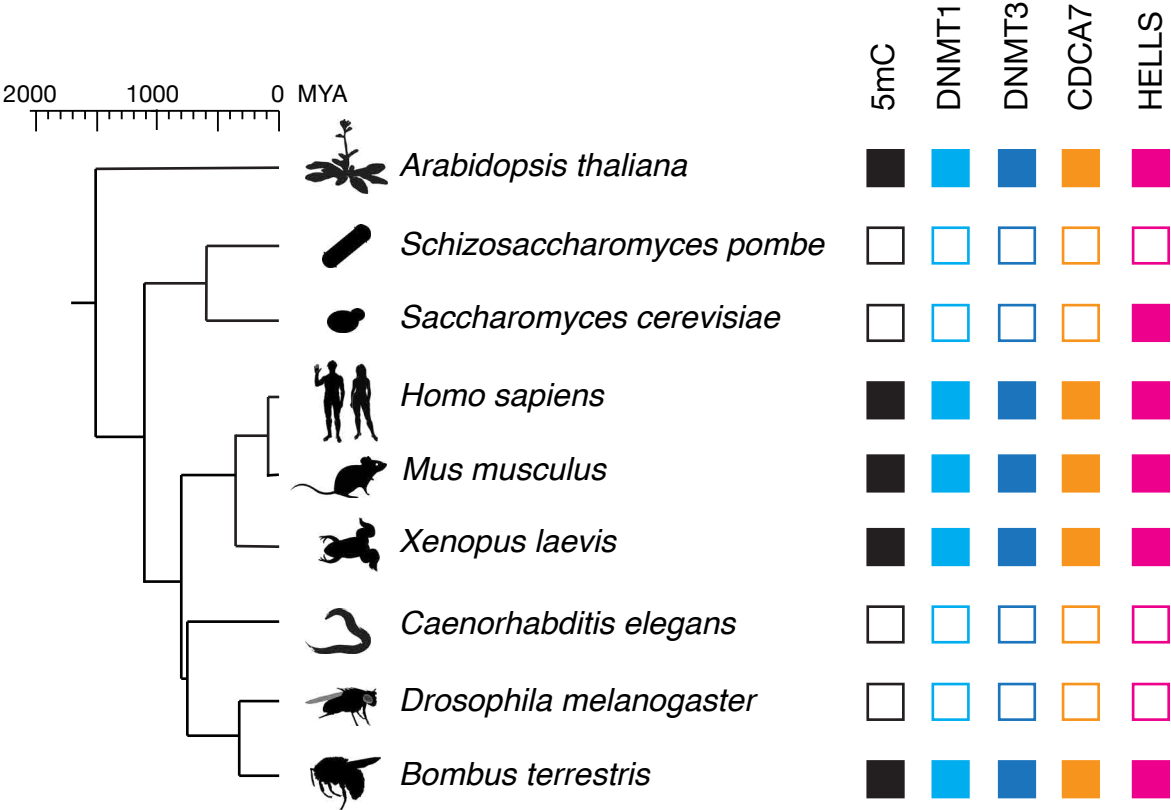

**Figure 1. CDCA7 is absent from model organisms with undetectable genomic 5mC**

Filled squares and open squares indicate presence and absence of an orthologous protein(s), respectively. CDCA7 homologs are absent from model organisms where DNMT1, DNMT3 and 5mC on genomic are absent.

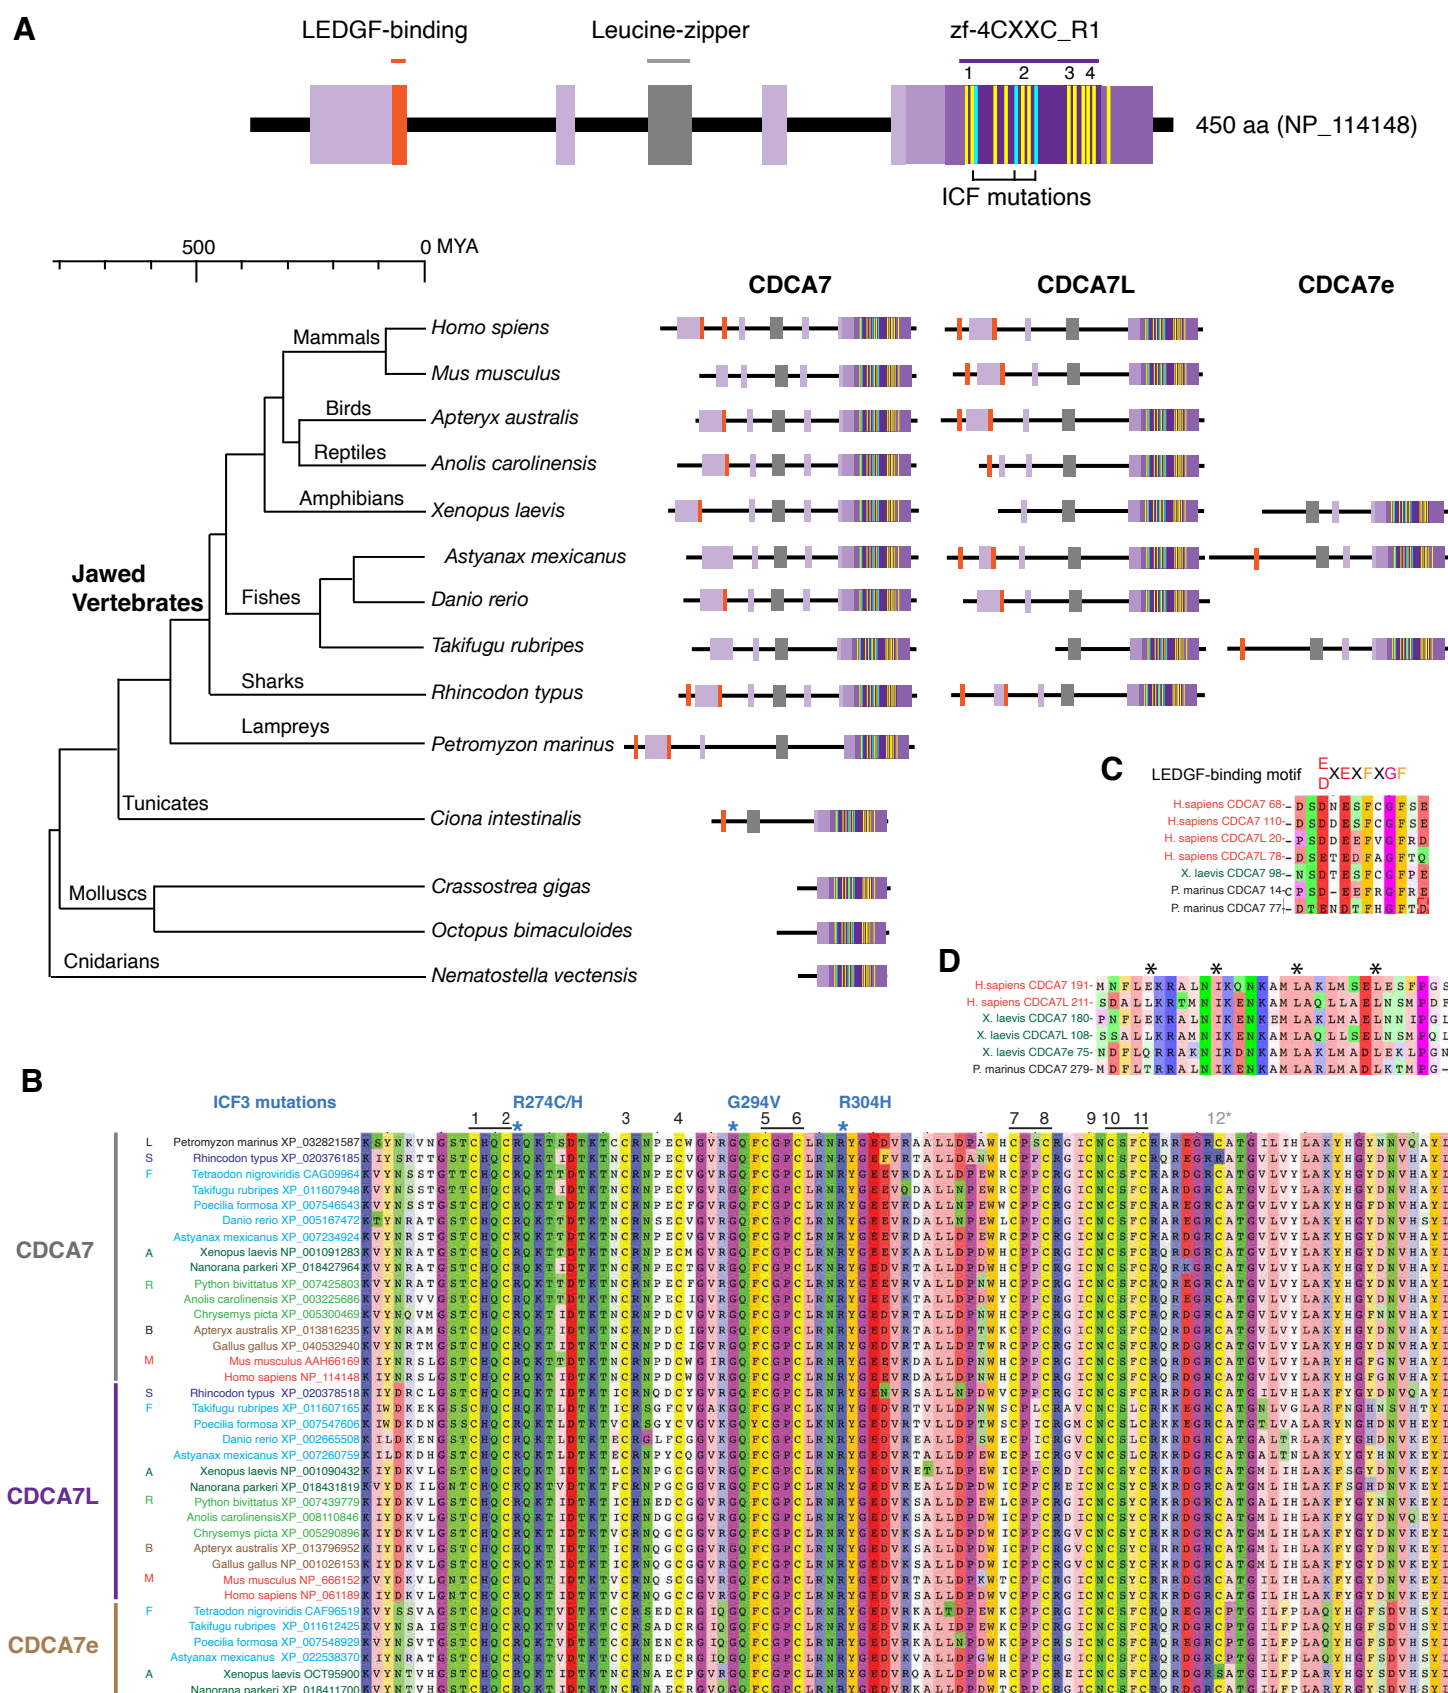

**Figure 2. CDCA7 paralogs in vertebrates**

A. Schematics of vertebrate CDCA7 primary sequence composition, based on NP\_114148. Yellow lines and light blue lines indicate positions of evolutionary conserved cysteine residues and residues that are mutated in ICF patients, respectively. B. Sequence alignment of the zf-4CXXC\_R1 domain of vertebrate CDCA7-family proteins. White arrowheads; amino residues unique in fish CDCA7L. Black arrowheads; residues that distinguish CDCA7L and CDCA7e from CDCA7. C. Sequence alignment of LEDGF-binding motifs. D. Sequence alignment of the conserved leucine-zipper.

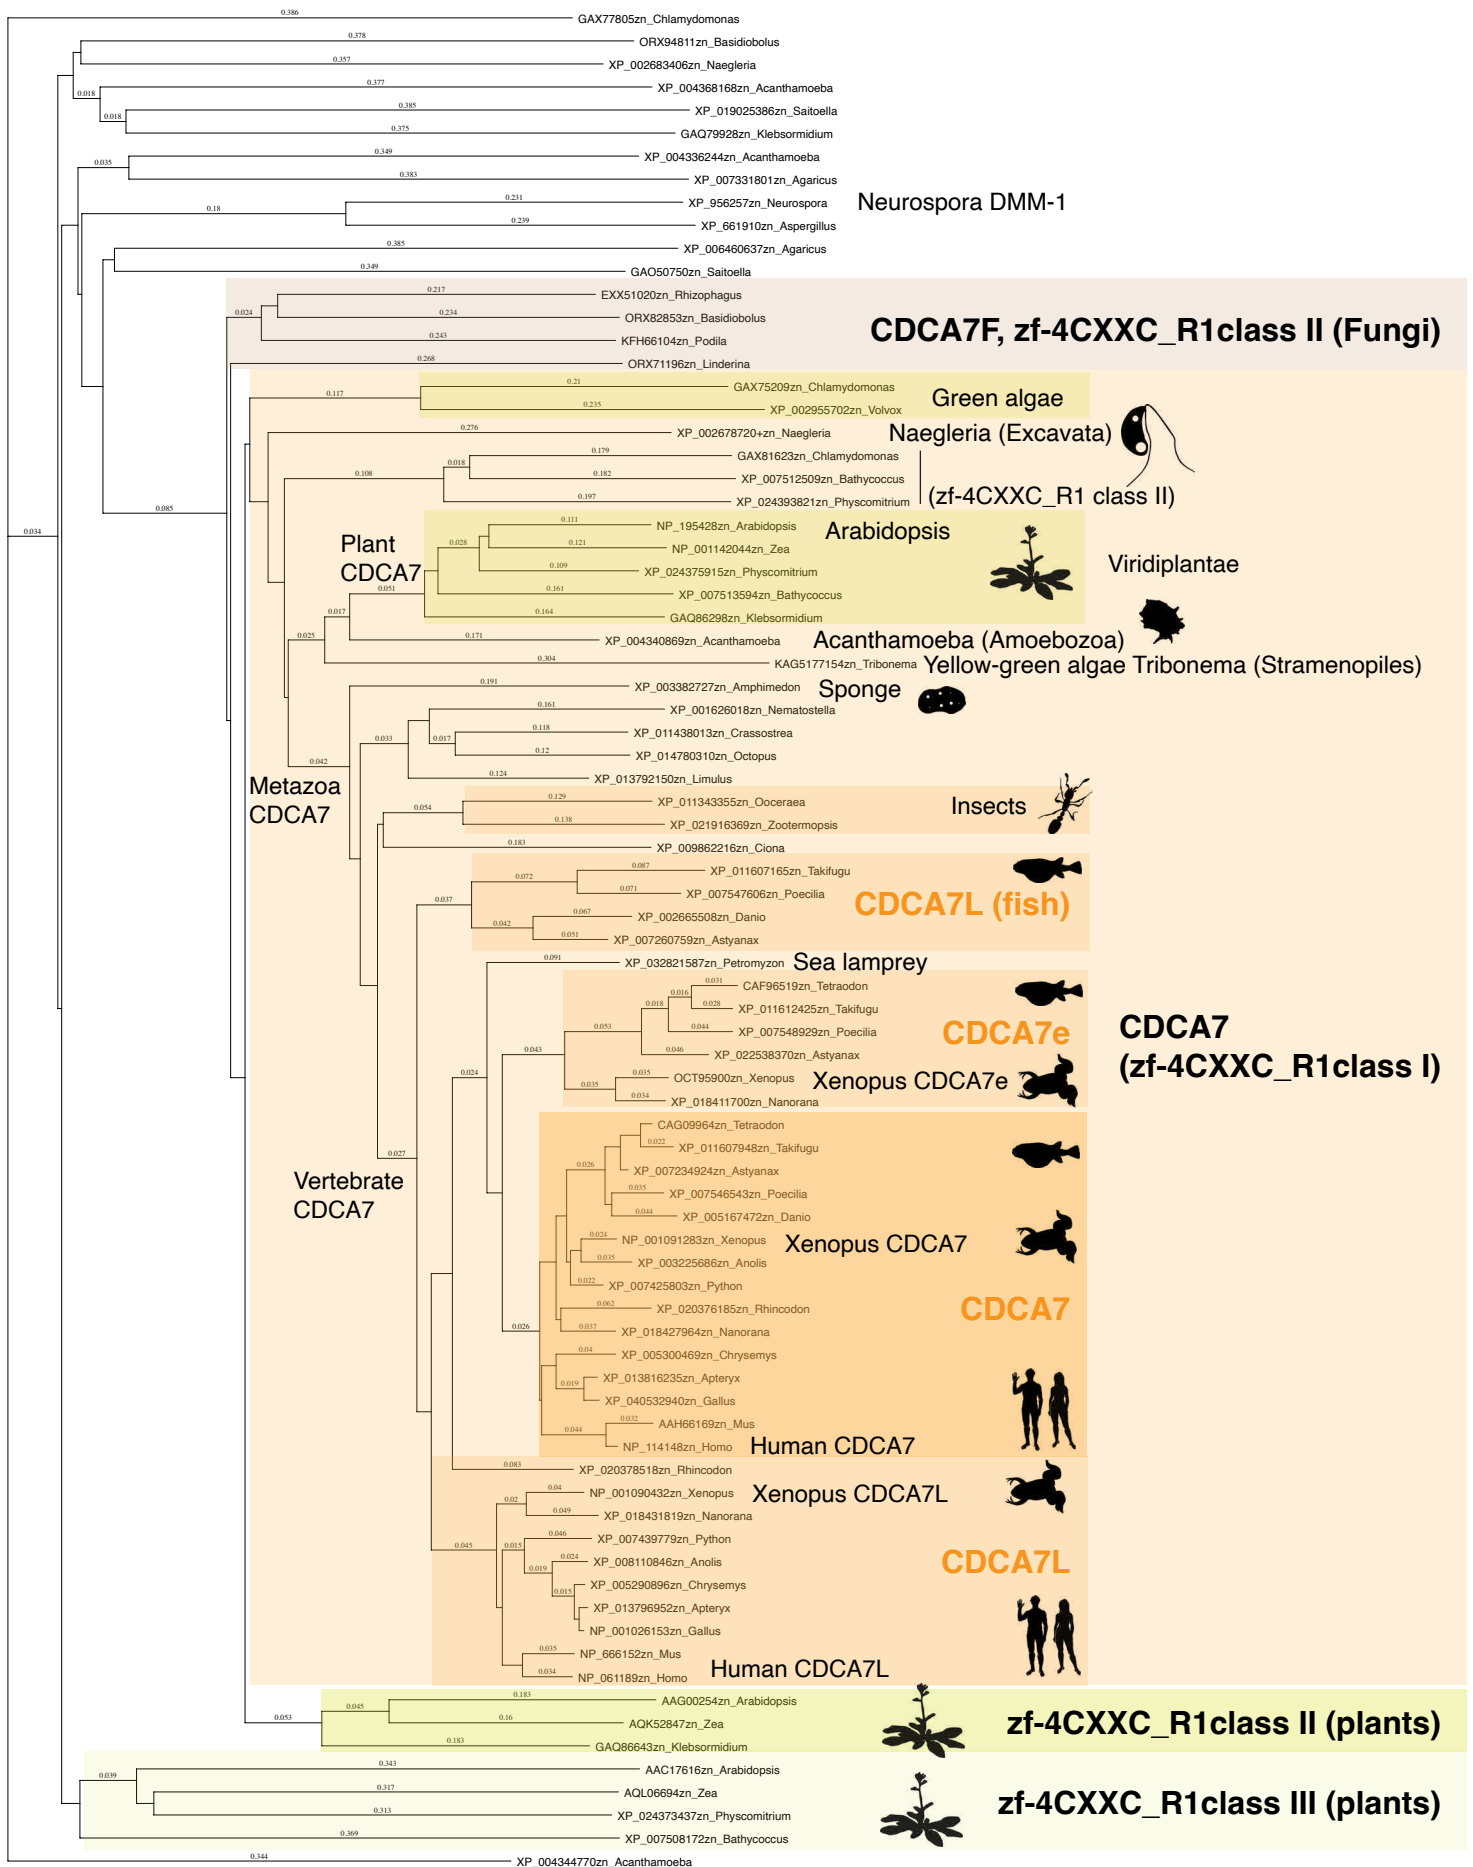

**Figure 2-figure supplement 1. Evolutionary conservation of CDCA7-family proteins and other zf-4CXXC\_R1-containing proteins**  
Amino acid sequences of zf-4CXXC\_R1 domain from indicated species were aligned with CLUSTALW. A phylogenetic tree of this alignment is shown. Genbank accession numbers of analyzed sequences are indicated. The tree topology was largely consistent with a tree generated by IQ-TREE based on an alignment using Muscle (Figure 2-source data 1 and Figure 2-source data 2).



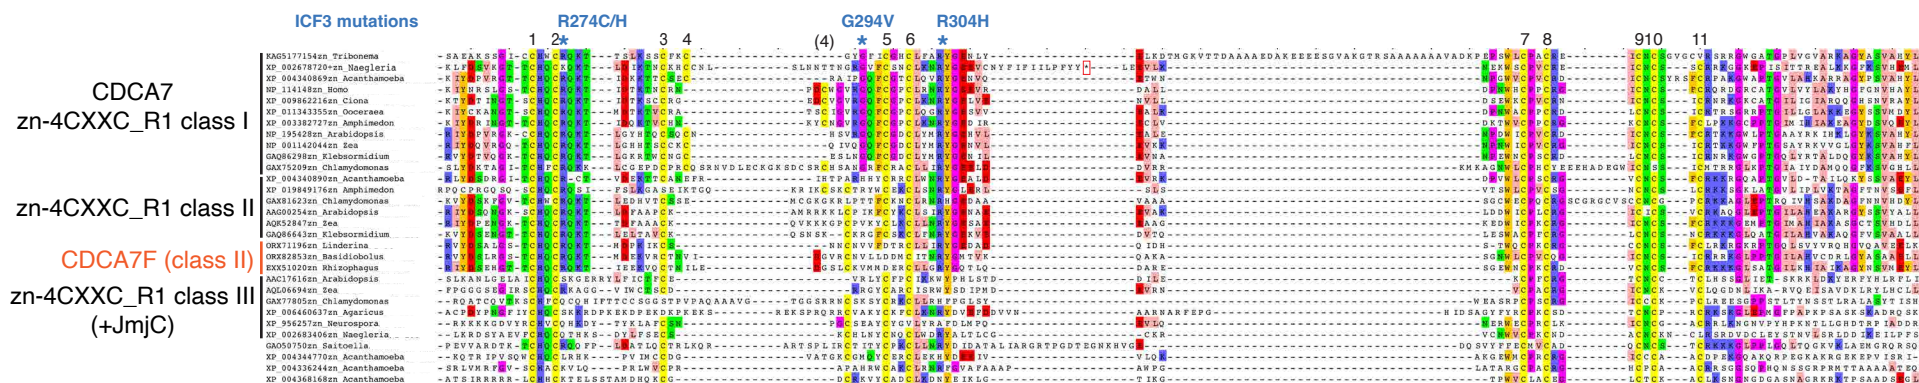

**Figure 3–figure supplement 1. Sequence alignment and classification of zf-4CXXC\_R1 domains across eukaryotes**

CDCA7 orthologs are characterized by the class I zf-4CXXC\_R1 domain, where eleven cysteine residues and three residues mutated in ICF patients are conserved. Class II zf-4CXXC\_R1 domain is similar to class I except that ICF-associated glycine (G294 in human) is substituted. Class III is zf-4CXXC\_R domain with more substitutions at the ICF-associated residues (R274 and/or G294). Proteins that also contain JmjC domain (sequence not shown here) are indicated. Note that codon frame after the stop codon (an asterisk in a magenta box) of *Naegleria* XP\_002678720 encodes a peptide sequence that aligns well with human CDCA7, indicating that the apparent premature termination of XP\_002678720 is likely caused by a sequencing or annotation error.

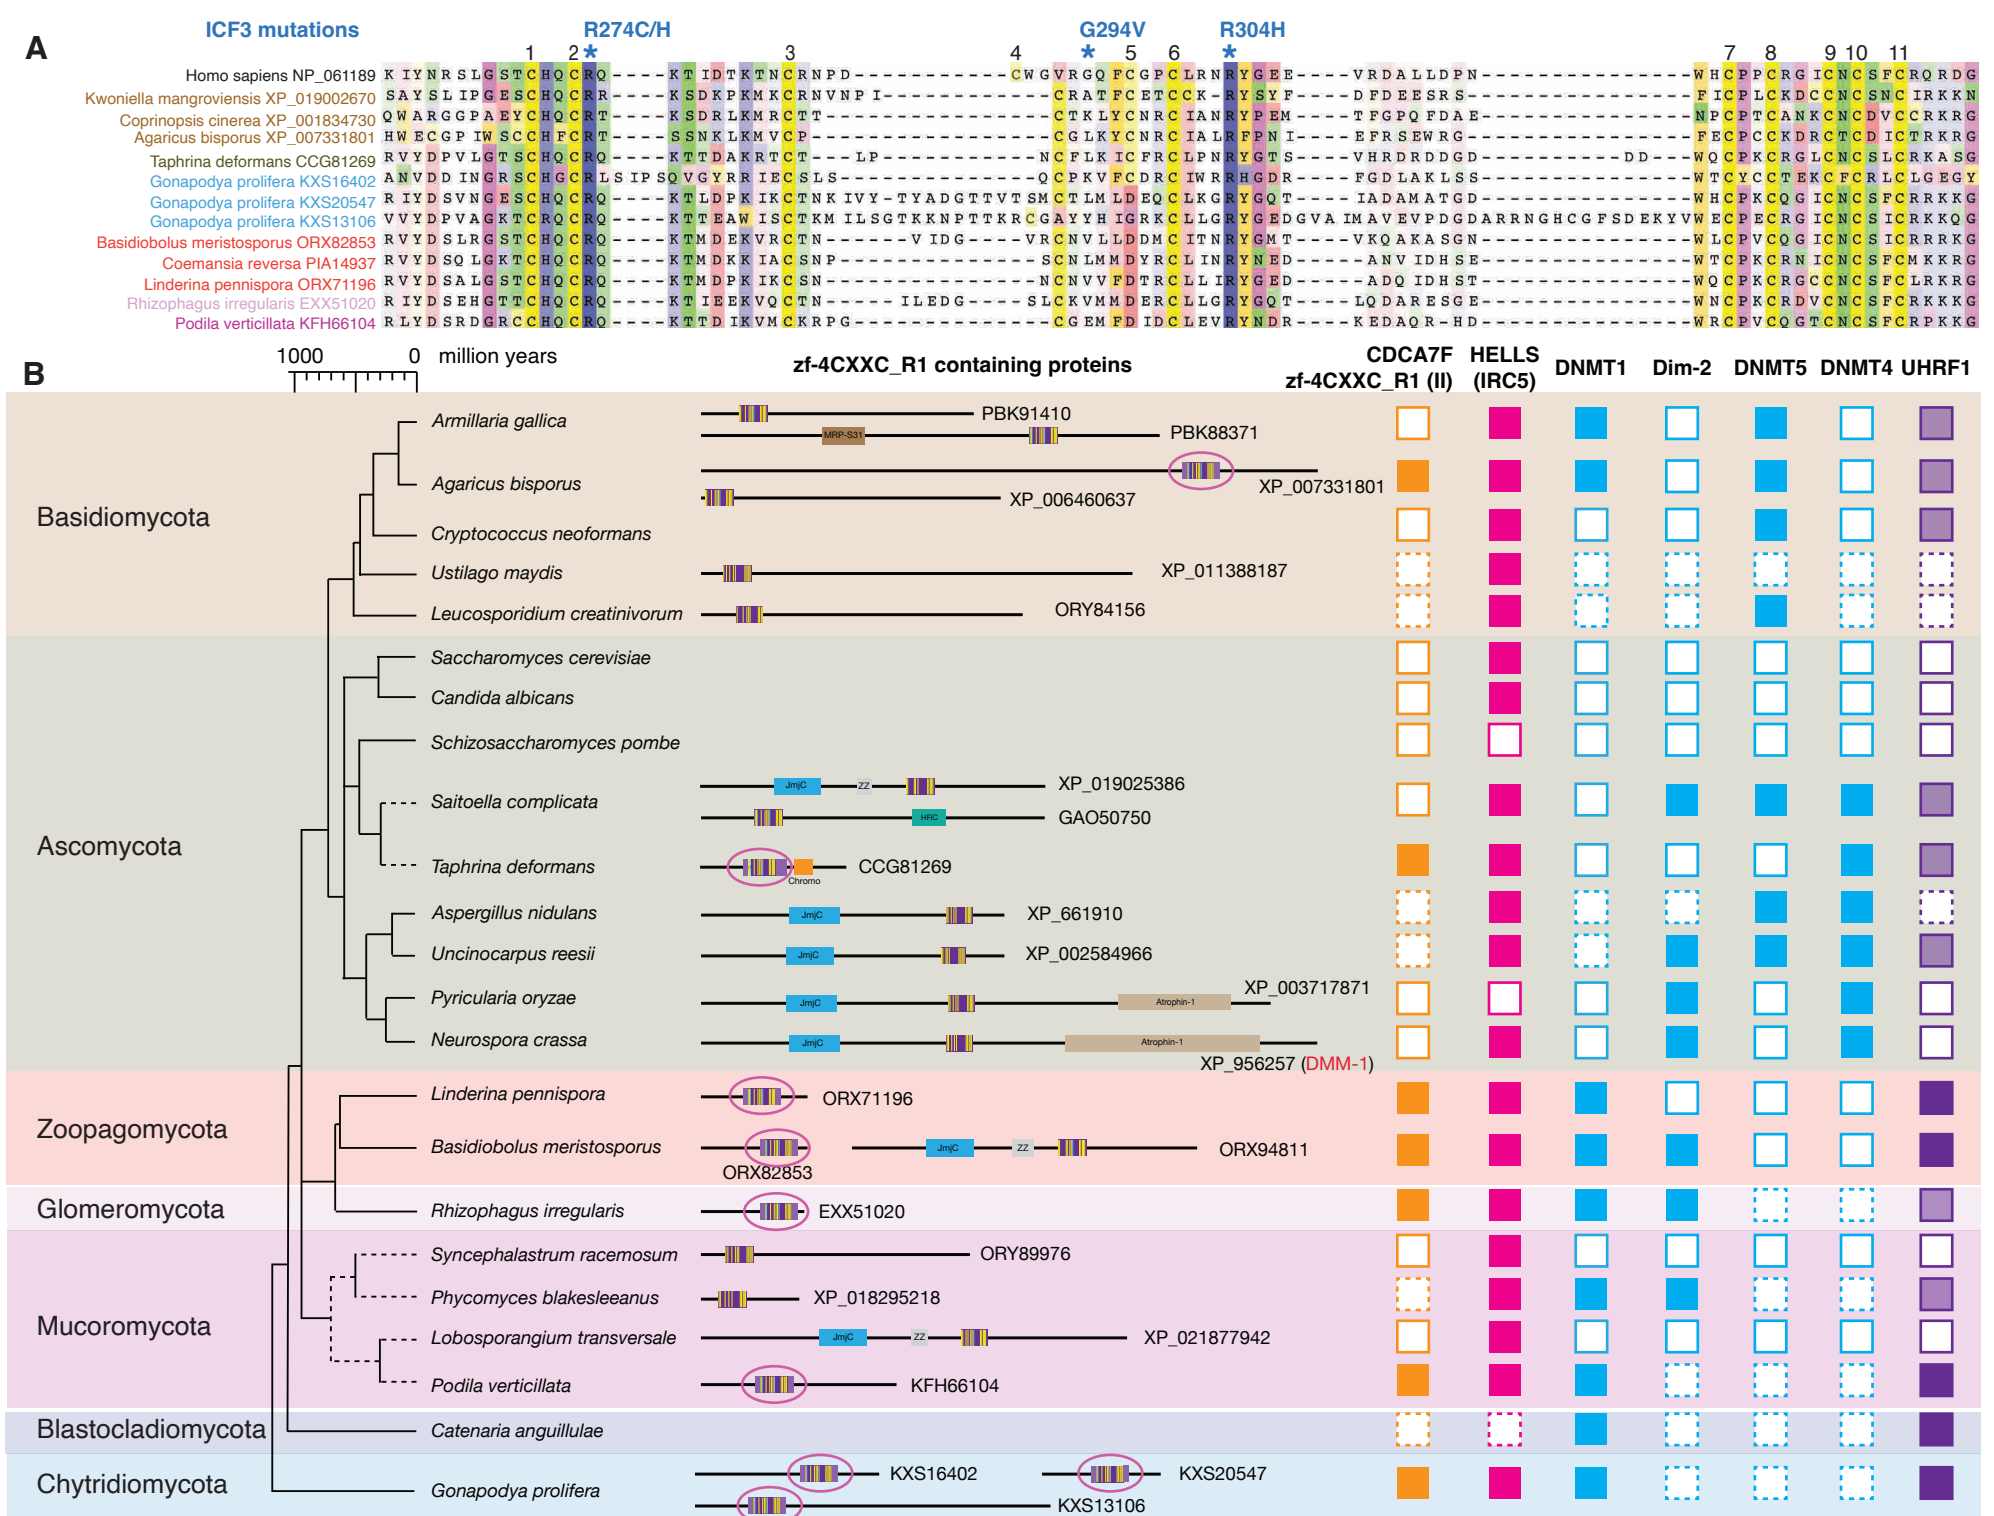

**Figure 4. Evolutionary conservation of CDCA7F, HELL5 and DNMTs in fungi.** **A.** Sequence alignment of fungi-specific CDCA7F with class II zf-4CXXC\_R1 sequences. **B.** Domain architectures of zf-4CXXC\_R1-containing proteins in fungi. The class II zf-4CXXC\_R1 domain is indicated with purple circles. Squares with dotted lines indicate preliminary genome assemblies. Opaque boxes of UHRF1 indicate homologs that harbor the SRA domain but not the RING-finger domain.





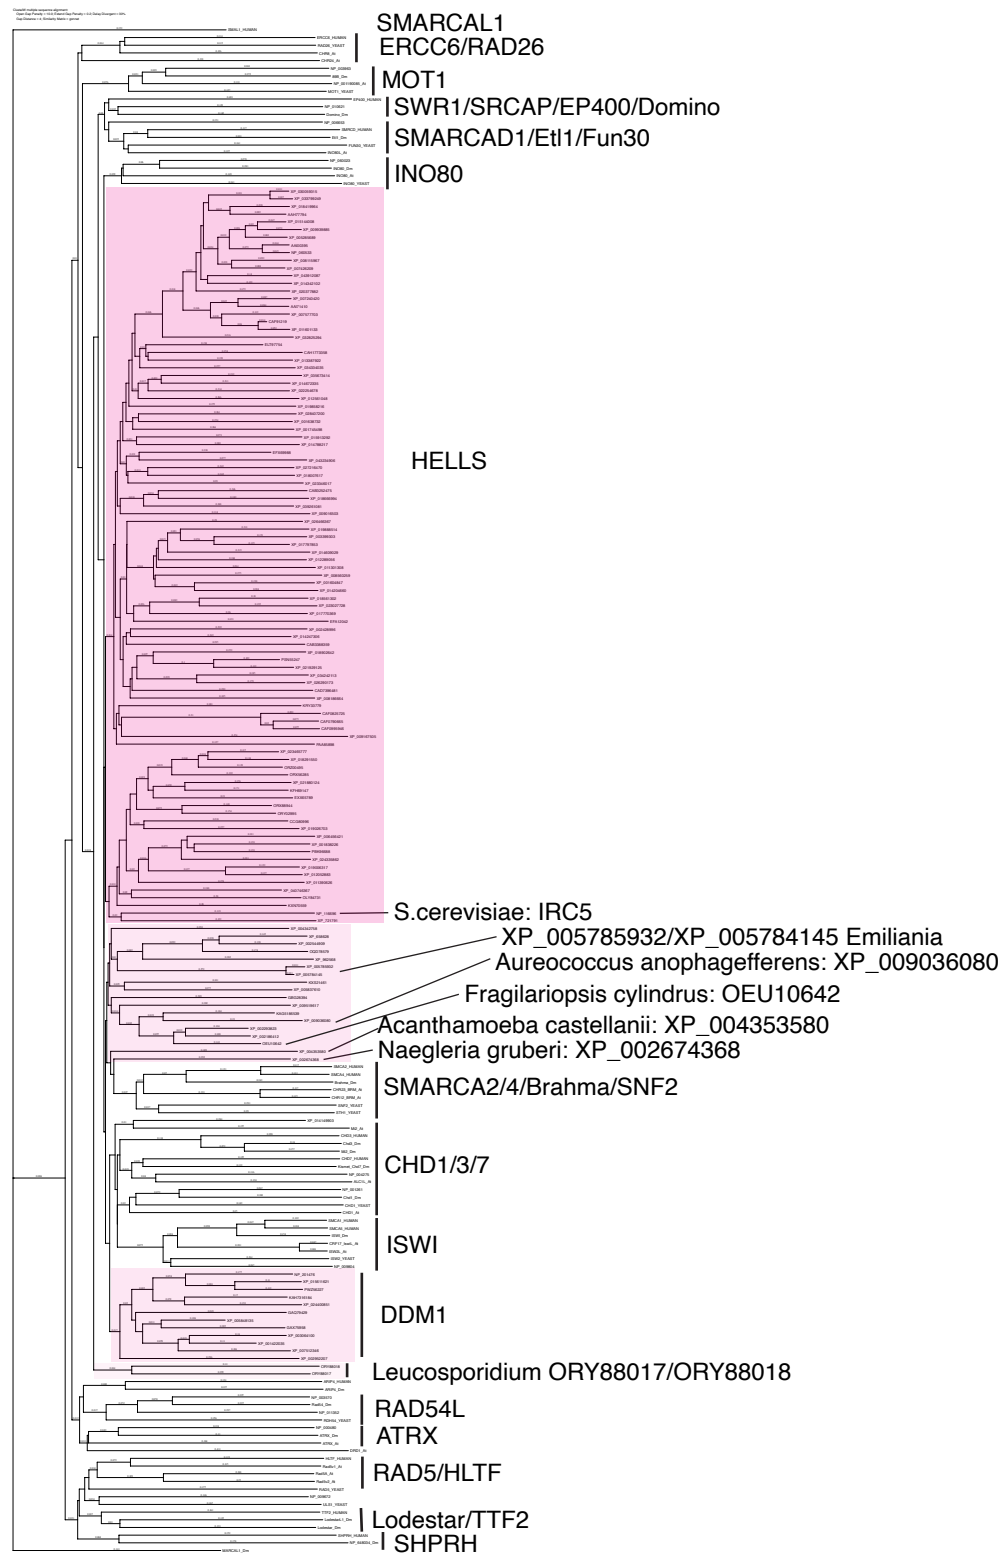

**Figure 5–figure supplement 2. Phylogenetic tree of HELLS and other SNF2 family proteins**

Amino acid sequences of full-length HELLS proteins from the panel of 180 eukaryote species listed in Figure 1–source data 1 were aligned with full length sequences of other SNF2 family proteins with CLUSTALW. A phylogenetic tree of this alignment is shown. Genbank accession numbers of analyzed sequences are indicated.

ClustalW multiple sequence alignment:

Open Gap Penalty = 10.0; Extend Gap Penalty = 0.2; Delay Divergent = 30%  
Gap Distance = 4; Similarity Matrix = gonnnet

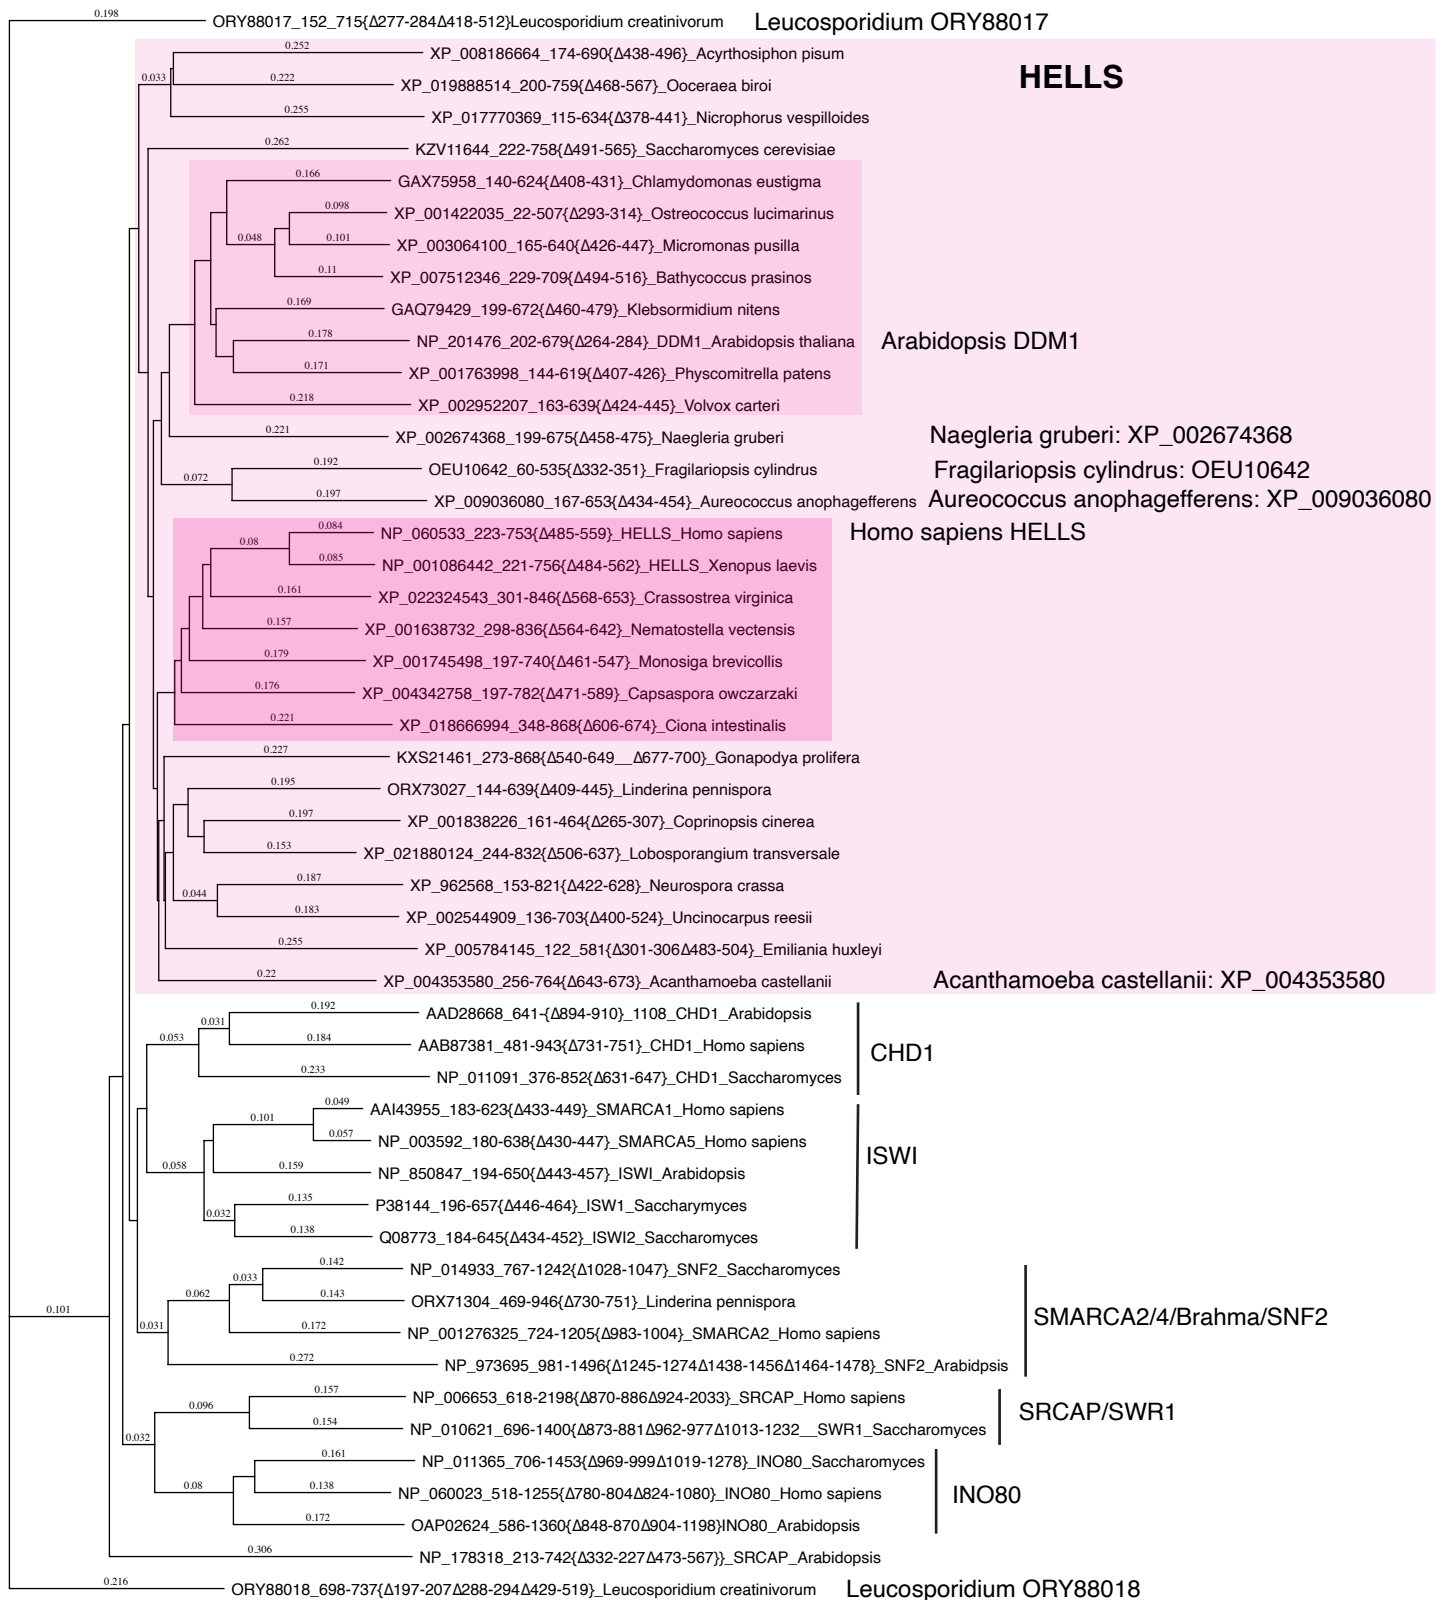

**Figure 5—figure supplement 3. Phylogenetic tree of the SNF2-domain**

Amino acid sequences of SNF2-domain without variable insertions from representative HELLS and DDM1-like proteins from Figure S3 were aligned with the corresponding domain of other SNF2 family proteins with CLUST-ALW. A phylogenetic tree of this alignment is shown. Genbank accession numbers of analyzed sequences are indicated. The tree topology was largely consistent with a tree generated by IQ-TREE based on an alignment using Muscle (Figure 5—source data 1 and Figure 5—source data 2).

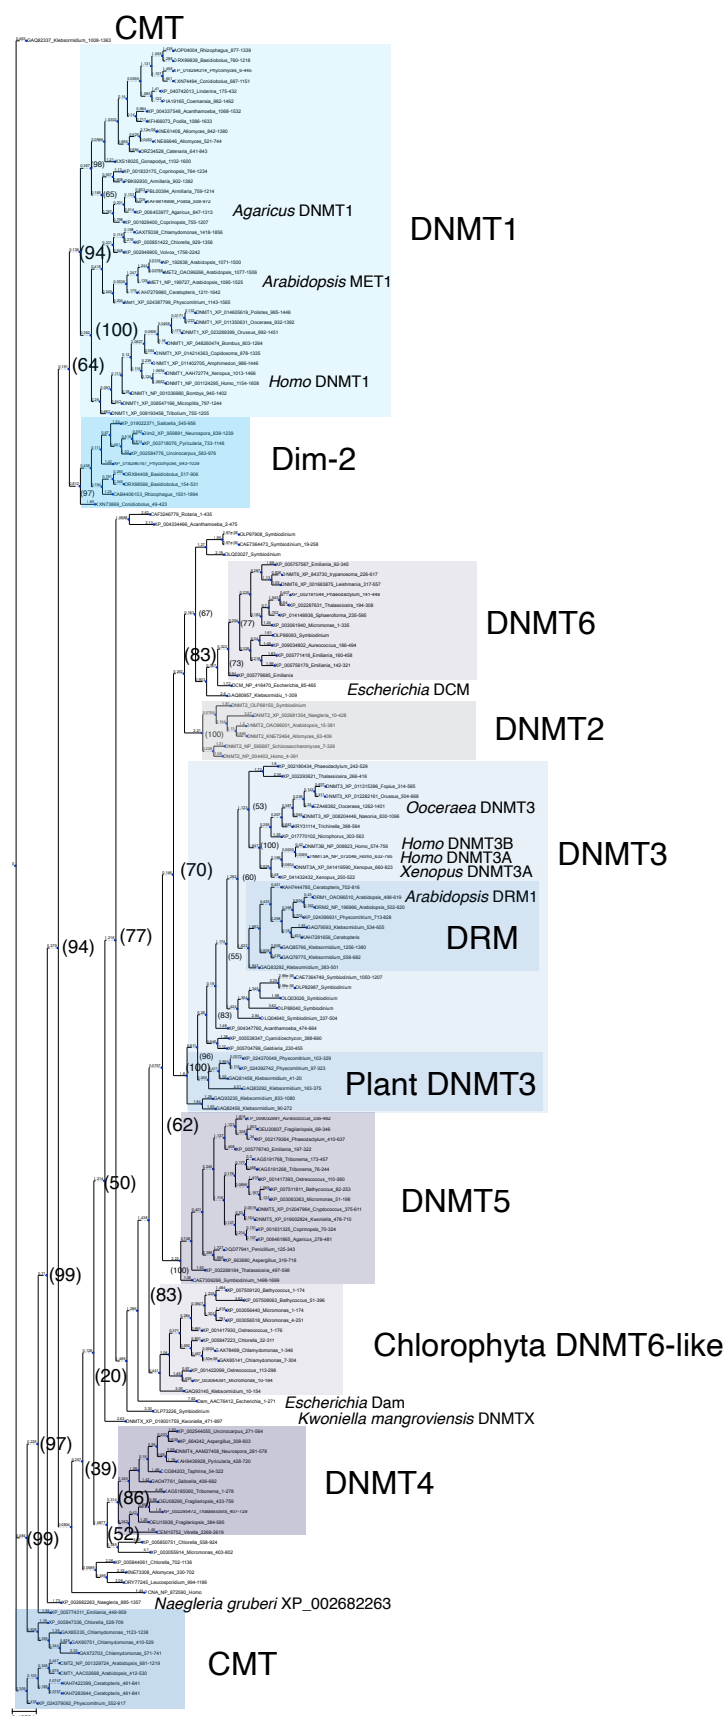

**Figure 5—figure supplement 4. Phylogenetic tree of DNMT proteins**

DNA methyltransferase domain of DNMT proteins across eukaryotes (Figure 1—source data 1, excluding majority of those from Metazoa), the *Escherichia coli* DNA methylases DCM and Dam, and *Homo sapiens* PCNA as an outlier sequence, were aligned with Muscle, and a consensus phylogenetic tree was constructed from 1000 bootstrap trees using IQ-TREE. Branch lengths are optimized by maximum likelihood on original alignment. Numbers in parentheses are bootstrap supports (%).

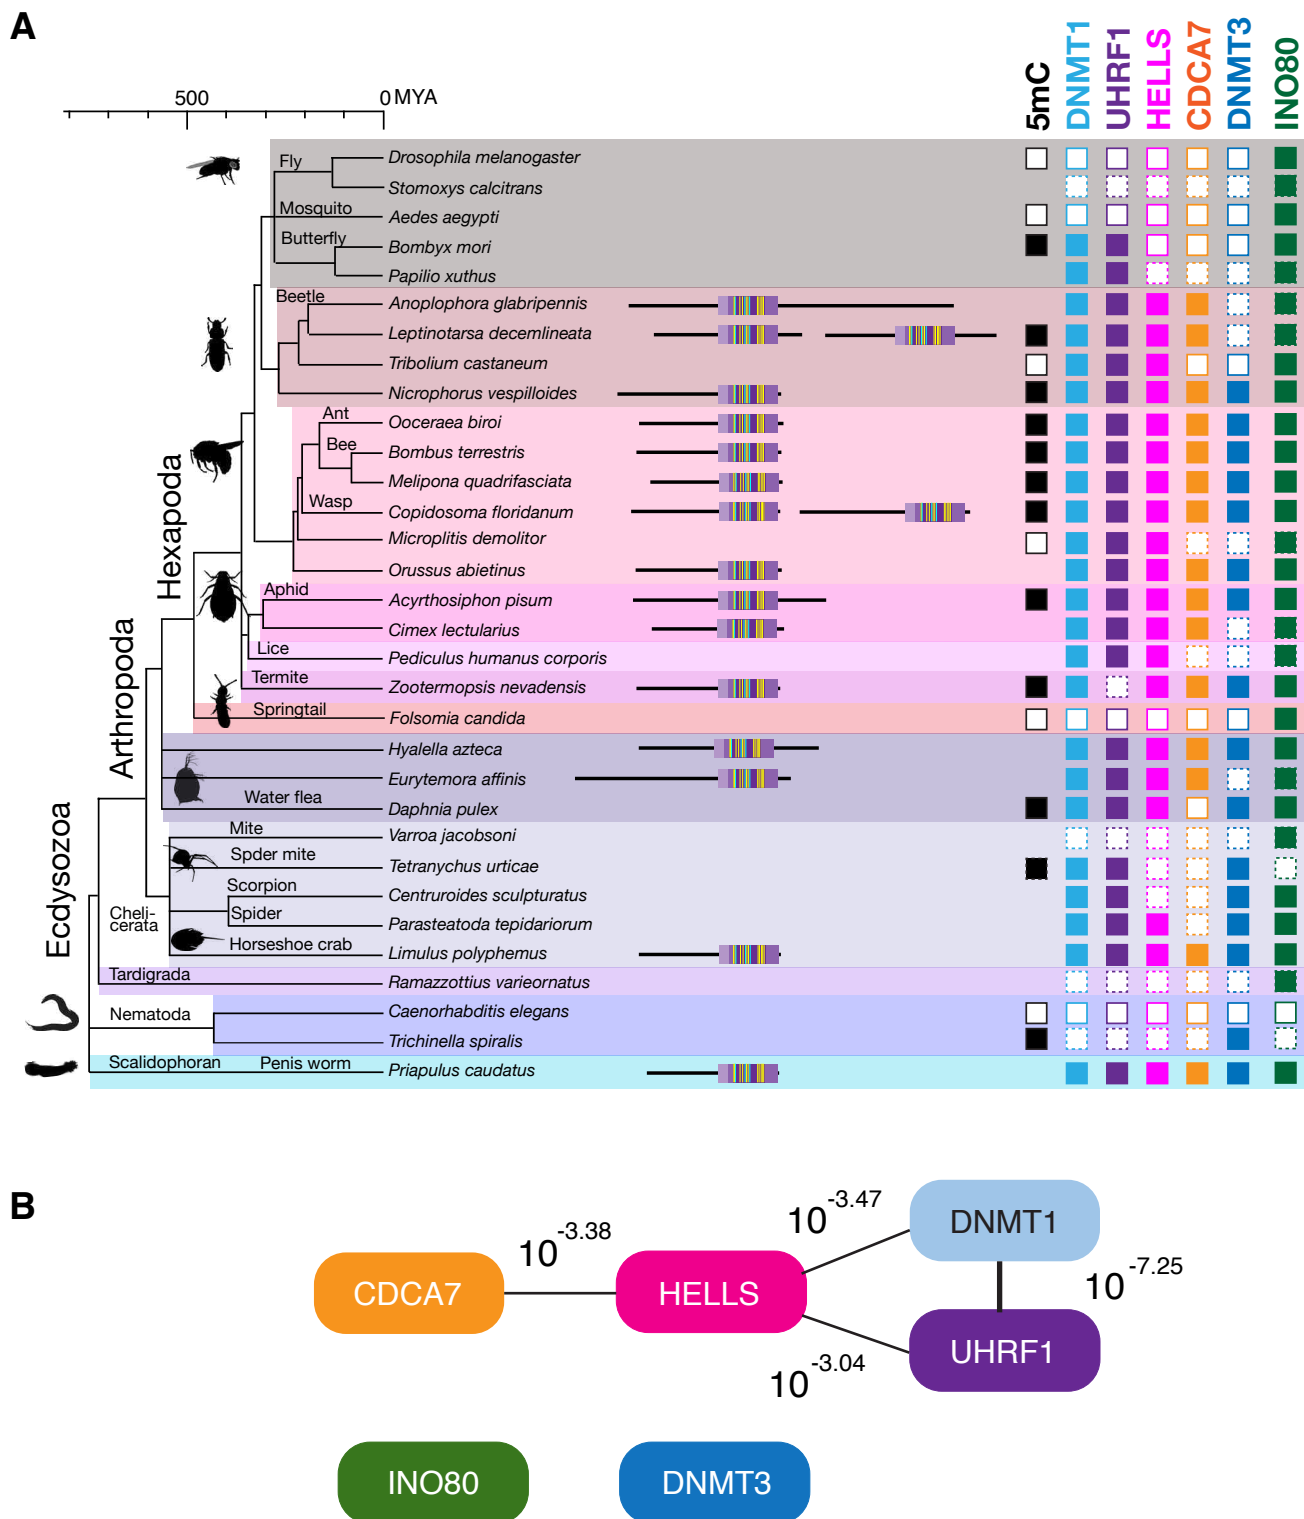

**Figure 6. Coevolution of CDCA7, HELLS, UHRF1 and DNMT1 in Ecdysozoa**

**A.** Presence (filled squares) /absence (open squares) patterns of indicated proteins and genomic 5mC in selected Ecdysozoa species. Squares with dotted lines imply preliminary-level genome assemblies. Domain architectures of CDCA7 proteins with a zf-4CXXC\_R1 domain are also shown.

**B.** CoPAP analysis of 50 Ecdysozoa species. Presence/absence patterns of indicated proteins during evolution were analyzed. List of species are shown in Figure 1—source data 1. Phylogenetic tree was generated by amino acid sequences of all proteins shown in Figure 1—source data 1. The number indicates the p-values.

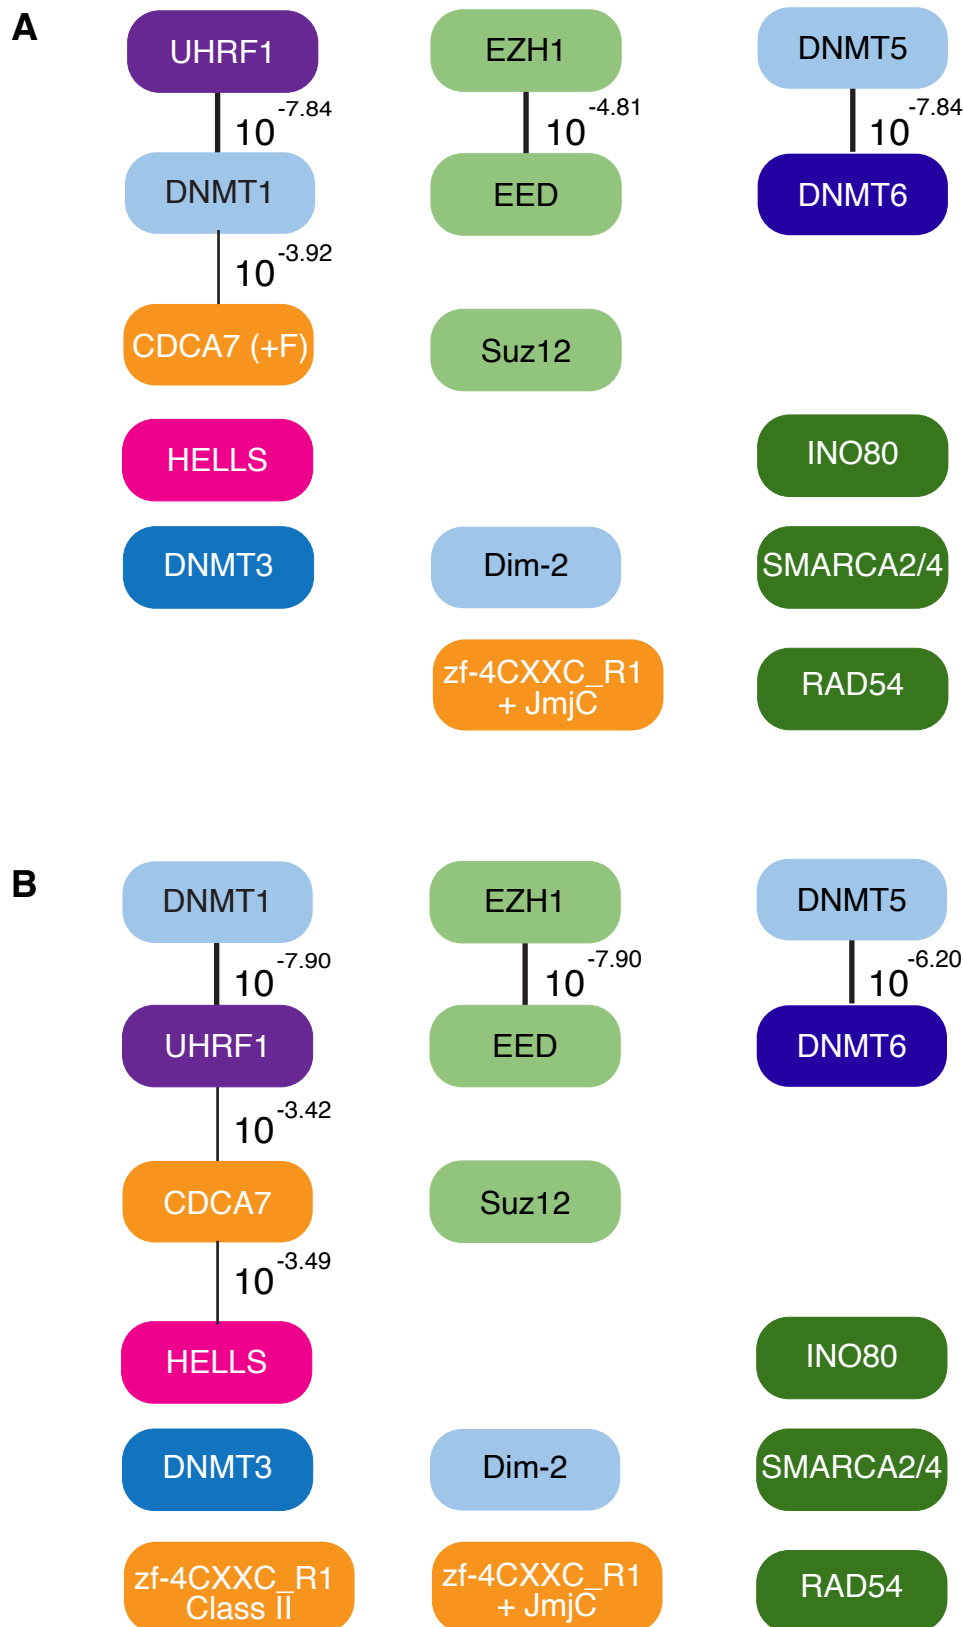

**Figure 6—figure supplement 1. CoPAP analysis of CDCA7, HELLS and DNMTs in eukaryotes**

CoPAP analysis of 180 eukaryote species. Presence and absence patterns of indicated proteins during evolution were analyzed. List of species are shown in Figure 1—source data 1 (**A**, Tab4. Full CoPAP1; **B**, Tab 5. Full CoPAP2). Fungal CDCA7F proteins are included in CDCA7 and zf-4CXXC\_R1 class II in A and B, respectively. Phylogenetic tree was generated by amino acid sequences of all proteins shown in Figure 1—source data 1. The number indicates the *p*-values.

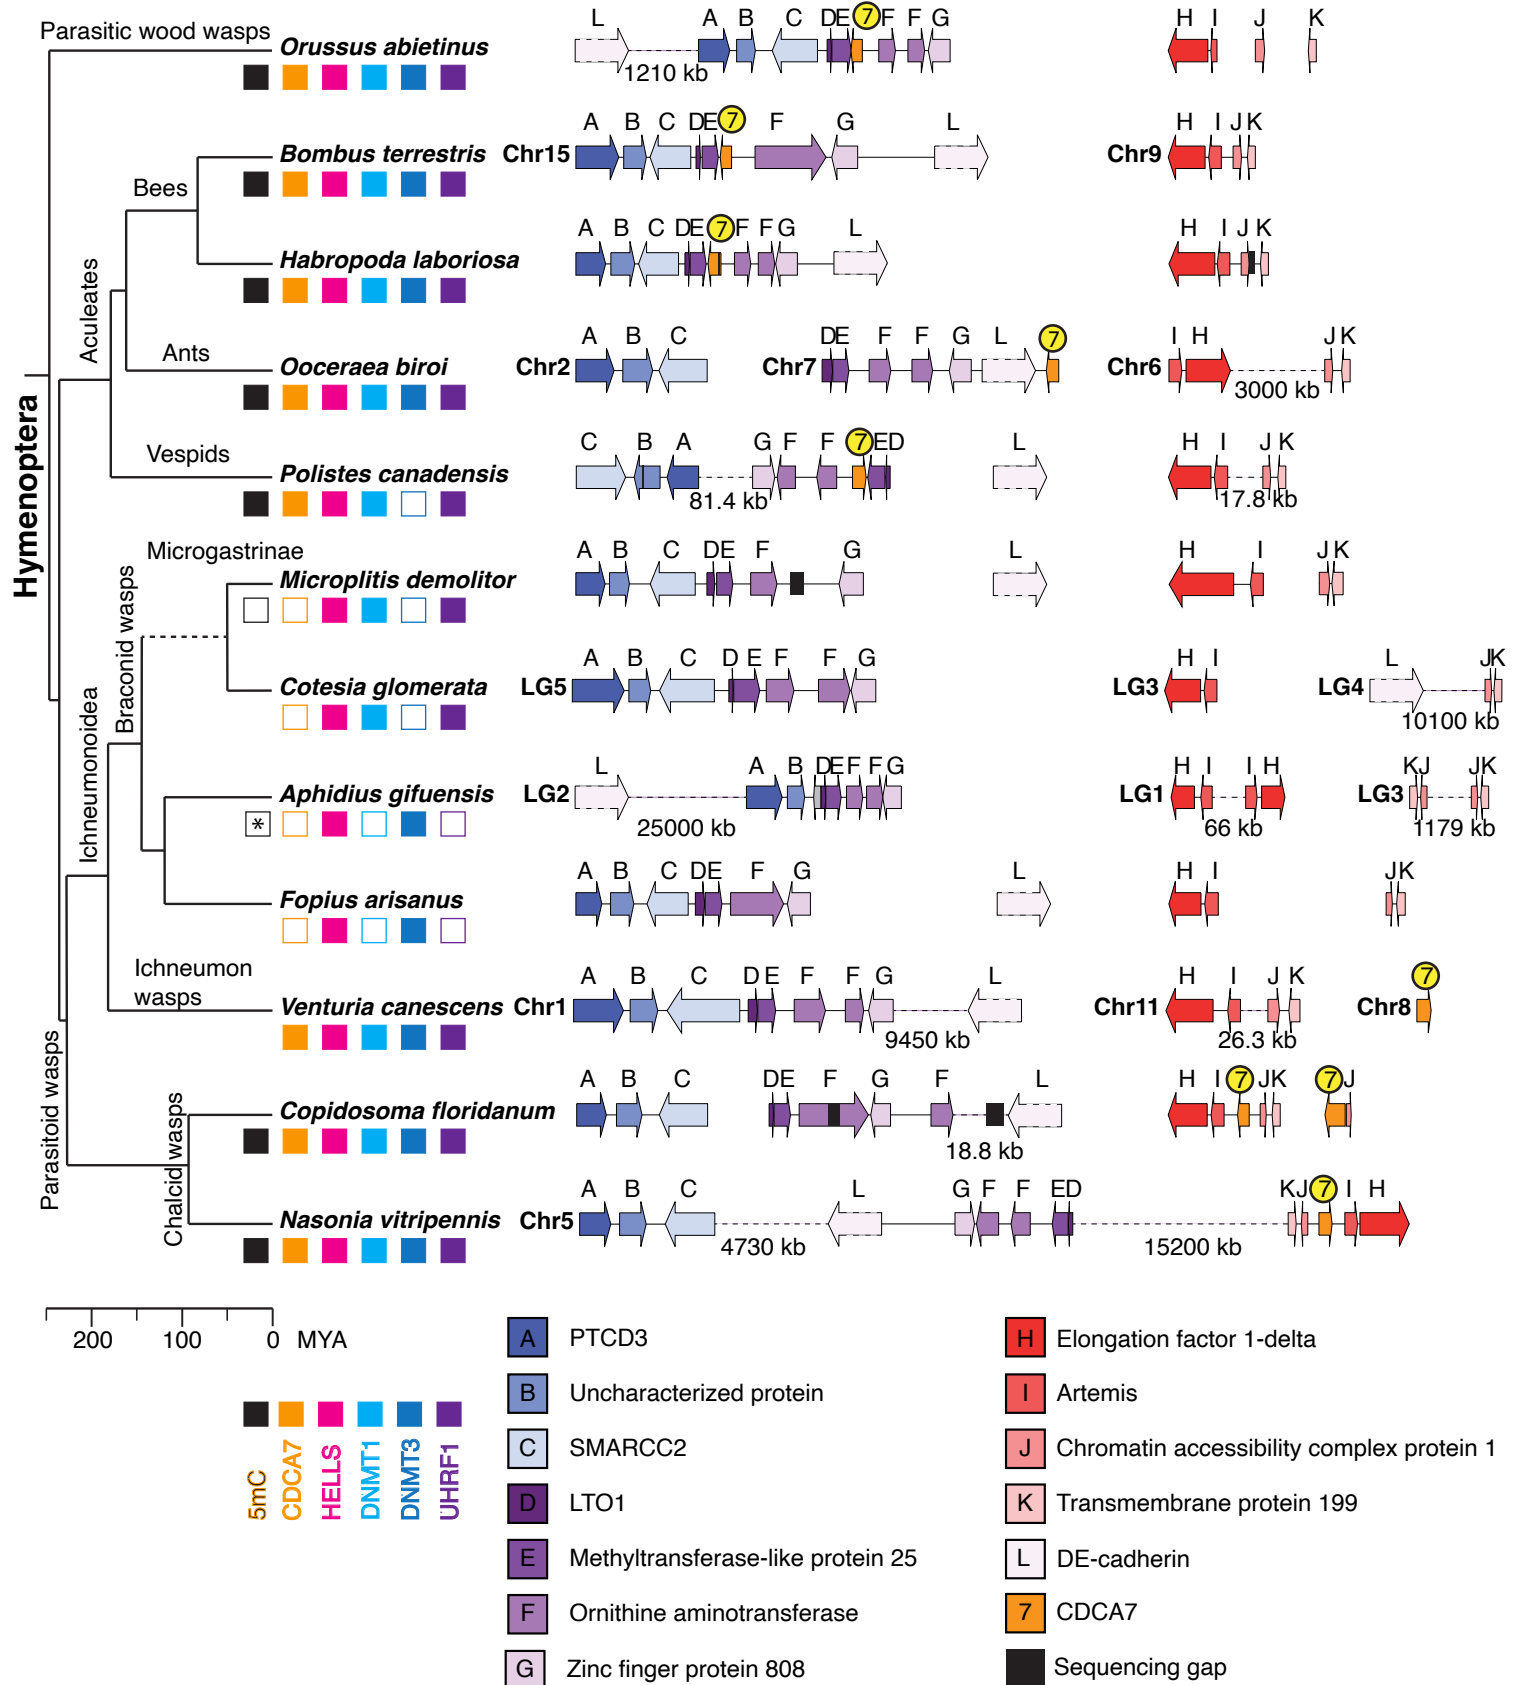

Source: http://biorxiv.org/content/10.1101/2023.01.30.526367v4.full.pdf
